# Supplementary material for: Sectorial and regional uncertainty analysis of the contribution of anthropogenic emissions to regional and global PM 2.5 health impacts
Source: Copernicus journal article supplement (doi:10.5194/acp-2017-779), 2017-09-12
Supplement: Supplementary file [file acp-2017-779-AC7-supplement.pdf]

# Sectorial and regional uncertainty analysis of the contribution of anthropogenic emissions to regional and global PM<sub>2.5</sub> health impacts

Monica Crippa<sup>1</sup>, Greet Janssens-Maenhout<sup>1</sup>, Diego Guizzardi<sup>2</sup>, Rita Van Dingenen<sup>1</sup>, Frank Dentener<sup>1</sup>

<sup>1</sup>European Commission, Joint Research Centre (JRC), Via E. Fermi 2749, I-21027 Ispra (VA), Italy

<sup>2</sup>Didesk Informatica, Verbania (VB), Italy

## Abstract

In this work we couple the HTAP\_v2.2 global air pollutant emission inventory with the global source receptor model TM5-FASST to evaluate the relative contributions of the major anthropogenic emission sources (power generation, industry, ground transport, residential, agriculture and international shipping) to air quality and human health in 2010. We focus on particulate matter (PM) concentrations because of the relative importance of PM<sub>2.5</sub> emissions in populated areas and the well-documented cumulative negative effects on human health. We estimate that in 2010, depending on the region, annual averaged anthropogenic PM<sub>2.5</sub> concentrations varied between ca 1 and 40 µg/m<sup>3</sup>, with the highest concentrations observed in China and India, and lower concentrations in Europe and North America. The relative contribution of anthropogenic emission sources to PM<sub>2.5</sub> concentrations varies between the regions. European PM pollution is mainly influenced by the agricultural and residential sectors, while the major contributing sectors to PM pollution in Asia and the emerging economies are the power generation, industrial and residential sectors. We also evaluate the emission sectors and emission regions in which pollution reduction measures would lead to the largest improvement on the overall air quality. We show that air quality improvements would require regional policies, in addition to local and urban scale measures, due to the transboundary features of PM pollution. We investigate emission inventory uncertainties and their propagation to PM<sub>2.5</sub> concentrations, in order to identify the most effective strategies to be implemented at sector and regional level to improve emission inventories knowledge and air quality. We show that the uncertainty of PM concentrations depends not only on the uncertainty of local emission inventories, but also on that of the surrounding regions. Finally, we propagate emission inventories uncertainty to PM concentrations and health impacts.

## 1 Introduction

Ambient particulate matter pollution ranks among the top five risk factors globally for loss of healthy life years and is the largest environmental risk factor (Lim et al., 2013; Anderson et al., 2012; Anenberg et al., 2012; Cohen et al., 2017). The world health organization (WHO, 2016) reported about 3 million premature deaths worldwide attributable to ambient air pollution in 2012. Health impacts of air pollution can be attributed to different anthropogenic emission sectors (power generation, industry, residential, transport, agriculture, etc.) and sector-specific

1 policies could effectively reduce health impacts of air pollution. These policies are usually  
2 implemented under national legislation (Henneman et al., 2017; Morgan, 2012), while in Europe  
3 transboundary air pollution is also addressed by the regional protocol under the UNECE  
4 Convention on Long-Range Transport of Air Pollution (CLRTAP). At city/local level, several  
5 studies have been developed to assess the contribution of sector specific emissions to PM<sub>2.5</sub>  
6 concentrations with the aim of designing air quality plans at local and regional level (Karagulian  
7 et al., 2015; Thunis et al., 2016). Indeed, particulate matter can travel thousands of kilometers,  
8 crossing national borders, oceans and even continents (HTAP, part A, 2010). Local, regional and  
9 international coordination is therefore needed to define air pollution policies to improve globally  
10 air quality and possibly human health. The CLRTAP's Task Force on Hemispheric Transport of  
11 Air Pollution looks at the long-range transport of air pollutants in the Northern Hemisphere  
12 aiming to identify promising mitigation measures to reduce background pollution levels and its  
13 contribution to pollution in rural as well as urban regions. Although primary PM<sub>2.5</sub> (particulate  
14 matter with a diameter less than 2.5 µm) and intermediately lived (days-to-weeks) precursor  
15 gases can travel over long distances, the transboundary components of anthropogenic PM are  
16 mainly associated with secondary aerosols which are formed in the atmosphere through complex  
17 chemical reactions and gas-to-aerosol transformation, transport and removal processes, of  
18 gaseous precursors transported out of source regions (Maas and Grennfelt, 2016). However, the  
19 most extreme episodes of exposure often occur under extended periods of low wind speeds and  
20 atmospheric stability, favoring formation of secondary aerosols close to the source regions.  
21 Secondary aerosol from anthropogenic sources consists of both inorganic -mainly ammonium  
22 nitrate and ammonium sulfate and ammonium bisulfate and associated water, formed from  
23 emissions of sulphur dioxide (SO<sub>2</sub>), nitrogen oxides (NO<sub>x</sub>) and ammonia (NH<sub>3</sub>), and organic  
24 compounds involving thousands of compounds and often poorly known reactions (Hallquist et  
25 al., 2009). Exposure to and impact from aerosols on humans can be estimated by a variety of  
26 approaches, ranging from epidemiological studies to pure modelling approaches. The Burnett et  
27 al. (2014) risk-response methodology is often used in models to estimate premature  
28 deaths/mortality (PD) due to air pollution exposure, e.g. in Lelieveld et al. (2015) and Silva et al.  
29 (2016), who report a global mortality in 2010 due to air quality issues induced by anthropogenic  
30 emissions of 2.5 and 2.2 million people, respectively. A higher global mortality is found in a  
31 more recent work by Cohen et al. (2017) accounting for 3.9 million premature deaths/year due to  
32 different model assumptions. In Europe, Brant et al. (2013) estimate 680 thousand premature  
33 deaths, which is twice as high as the numbers reported for the CAFE (Clean Air for Europe)  
34 study (Watkiss et al., 2005). Recently, using the same emission database as in this study, Im et  
35 al. (2017) report a multi-model mean estimate of PD of 414.000 (range 230-570 thousand) for  
36 Europe and 160 thousand PDs for the USA. At the global scale, models, in some cases using  
37 satellite information (Brauer et al., 2015; Van Donkelaar et al., 2016), are the most practical  
38 source of information of exposure to air pollution. However, model calculations are subject to a  
39 range of uncertainties related with incomplete understanding of transport, chemical  
40 transformation, removal processes, and not the least, emission information.

41 This work is developed in the context of the TF HTAP Phase 2 (Galmarini et al., 2017a), where a  
42 number of models are deployed to assess long-range sensitivities to extra-regional emissions,  
43 using the same HTAP\_v2.2 anthropogenic emission inventory (Janssens-Maenhout et al., 2015).  
44 Differences in model results illustrate uncertainties in model formulations of transport, chemistry  
45 and removal processes, and are addressed in separate studies (Liang et al., 2018), but not of  
46 uncertainties in emission inventories. The objective of this study is to evaluate the relevance of

uncertainties in regional sectorial emission inventories (power generation, industry, ground transport, residential, agriculture and international shipping), and their propagation in modelled  $PM_{2.5}$  concentrations and associated impacts on health. To this end we couple the HTAP\_v2.2 global emission inventory for the year 2010 and the global source-receptor model TM5-FASST (TM5-FAst Scenario Screening Tool) to estimate global air quality in terms of  $PM_{2.5}$  concentrations. The regional and global scale, the focus on annual  $PM_{2.5}$  and associated health metrics, warrants the use of the TM5-FASST model. However, the most extreme episodes of pollution may occur at more local-to-regional scales justifying the need for local. For instance, a recent study performed over hundreds of cities in Europe (Thunis et al., 2017) shows that in order to comply with the standards prescribed by the Air Quality Directives and the health guidelines by WHO, local actions at the city scale are needed.

Specifically, we show that the impact of emission inventory uncertainty on mortality estimates is comparable with the range of uncertainty induced by air quality models and population exposure functions. We also investigate the uncertainties in  $PM_{2.5}$  from within the region to extra-regional contributions. A second objective of this analysis is to evaluate the importance of emission uncertainties at sector and regional level on  $PM_{2.5}$ , to better inform local, regional and hemispheric air quality policy makers on the potential impacts of sectors with larger uncertainties (e.g. residential and agriculture) or regions (e.g. developing and emerging countries).

## 2 Methodology

### 2.1 TM5-FASST model and emission perturbations

The TM5-FASST model is extensively documented in a companion publication in this special issue. Van Dingenen et al., (2018) provide an extensive evaluation of the model, model assumptions and performance with regard to linearity and additivity of concentration response to different size of emission perturbations and future emission scenarios. The validation of TM5-FASST against the full TM5 model runs is extensively discussed by van Dingenen et al. (2018), as well as the validity of the assumptions of linearity and additivity behind this reduced form-model. Below we summarize the most important features of relevance for this work, and refer for more detail to Van Dingenen et al., (2018).

In order to calculate  $PM_{2.5}$  concentrations corresponding to the HTAP\_v2.2 emissions, we use the native  $1^\circ \times 1^\circ$  resolution source-receptor gridmaps obtained for TM5-FASST\_v0 (Van Dingenen et al., 2018). The TM5-FASST source-receptor model is based on a set of emission perturbation experiments (-20 %) of  $SO_2$ ,  $NO_x$ , CO,  $NH_3$ , and VOC and  $CH_4$  using the global  $1^\circ \times 1^\circ$  resolution TM5 model, the meteorological year 2001 (which was also used for the HTAP Phase 1 experiments) and the community emission dataset prepared for the IPCC AR5 report (RCP, Representative Concentration Pathway) emissions for the year 2000 (Lamarque et al., 2010). TM5-FASST uses aggregated regional emissions (i.e. one annual emission value per pollutant or precursor for each of the 56 regions + shipping), with an implicit underlying  $1^\circ \times 1^\circ$  resolution emission spatial distribution from RCP year 2000 which was partly based EDGAR methodology and gridmaps. The concentration of  $PM_{2.5}$  contributing from and to each of 56 receptor regions is estimated as a linear function of the emissions of the source regions, including the aerosol components BC, primary organic matter (POM),  $SO_4$ ,  $NO_3$ , and  $NH_4$ . While

Secondary Organic Aerosol (SOA) from natural sources is included in the model calculations using the parameterisation described in Dentener et al. (2006), no explicit treatment of anthropogenic SOA is considered, since no reliable emission inventories of SOA precursor gases was available, and formation processes were not included in the parent TM5 model. A recent study by Farina et al. (2010) indicates a global source of 1.6 Tg, or ca 5.5 % of the overall SOA formation due to anthropogenic SOA. The relative importance of anthropogenic SOA ranges regionally widely, and is deemed higher in regions with less VOC emission controls. We speculate that the inclusion of SOA would possibly lead to a somewhat larger role of the transboundary pollution transport, mainly for those sectors emitting PM and VOCs (e.g. residential, and to some extent transport and industry).

Under the assumption that the individual sector contributions add up linearly to total  $PM_{2.5}$  – this assumption is further evaluated in Van Dingenen et al. (2018) – the comparison of  $PM_{2.5}$  concentrations calculated for the reference and scenario case yields an estimation of the contribution of each sector to total  $PM_{2.5}$  concentrations.

Specifically, the reduced-form model TM5-FASST is computing the concentration resulting from an arbitrary emission scenario  $E_i$  using a “perturbation approach”, i.e. the difference between  $E_i$  and  $E_{i,ref}$  ( $dE$ ) is considered as a perturbation on  $E_{ref}$  and the resulting concentration is evaluated as a perturbation  $dPM$  on the reference concentration:

$$dPM(\mathbf{y}) = \sum_i SRC_i[x, y] \cdot [E_i(x) - E_{i,ref}(x)] \quad (\text{Eq. 1})$$

$$SRC_i[x, y] = \frac{\Delta PM_{ref}(y)}{\Delta E_{i,ref}(x)} \quad (\text{Eq. 2})$$

where the summation is made over all primary emitted components and precursors ( $i$ ) for secondary components, and  $SRC_i[x, y]$  is a set of Source-Receptor Coefficients describing the linearized relationship between each precursor emission of specific components and concentration for each pair of source ( $x$ ) and receptor ( $y$ ) region. Van Dingenen et al. (2018) explain in detail how the ‘perturbation approach’ can be also applied also for evaluating the attribution by sector as well as by source region. Thus to calculate total  $PM_{2.5}$  concentration in each receptor region, the 56 source region individual contributions must be summed. Using this approach, it is possible to evaluate the  $PM_{2.5}$  concentrations from “within-region” and “extra-regional”  $PM_{2.5}$  emissions. The extra-regional contribution represents the RERER metric (Response to Extra-Regional Emission Reduction) for a specific region used across the whole HTAP experiment (Galmarini et al., 2017b), in particular focusing on the  $PM_{2.5}$  concentration reduction due to the contribution of the emissions of each anthropogenic sector (Eq. 3):

$$RERER = \frac{\sum R(\text{foreign regions})}{\sum R(\text{all regions})} \quad (\text{Eq. 3})$$

where  $R$  represents the concentration response to each sector emission decrease.

As depicted in Fig. S1, the 56 TM5-FASST regions cover the entire globe, but their areal extent differs in terms of size, population, emission magnitude and presence of neighbouring countries (e.g. Europe comprises 18 TM5-FASST regions). In order to make smaller regions (e.g. European countries) comparable with larger regions (like USA, China and India), in this work an aggregation procedure to 10 world regions (refer to Table S2) has been applied (China+, India+, SE Asia, North America, Europe, Oceania, Latin America, Africa, Russia and Middle East). In this work we focus on particulate matter due to its negative effects on human health (WHO, 2013; Pope and Dockery, 2006), (Worldbank, 2016). The TM5-FASST model includes an assessment of the premature mortality due to ambient PM<sub>2.5</sub> concentrations on exposed population following the methodology developed by Burnett et al. (2014), as discussed in Sect. 4. Health impacts due to indoor air pollution or ozone are not evaluated in this work.

The aim of this work is to address the uncertainty of sector specific emissions from this inventory in a quantitative way as well as the differences we observe from one region to the other, based on the uncertainty of activity data and emission factors. As discussed in the next section, the reason to use HTAP\_v2.2 and not e.g. the RCP2000 as the basis for our assessment of emission propagation is that the TF HTAP aims at bringing policy relevant information, and to this end, it has compiled a policy relevant emission inventory (HTAP\_v2.2) for the most recently available year. While the RCP2000 was at the basis of the FASST calculations, and presented the best community emissions effort at the time, the HTAP\_v2.2 inventory is now day much more accurate in particular given the focus on regional (and not so much gridded) emission analysis of our work.

## 2.2 HTAP\_v2.2 emissions

The global anthropogenic emission inventory HTAP\_v2.2 for the year 2010 is input to the global source-receptor model TM5-FASST to evaluate PM<sub>2.5</sub> concentrations for each world region/country with the corresponding health effects. The HTAP\_v2.2 inventory includes for most countries official and semi-official annual anthropogenic emissions of SO<sub>2</sub>, NO<sub>x</sub>, CO (carbon monoxide), NMVOC (non-methane volatile organic compounds), PM<sub>10</sub> (particulate matter with a diameter less than 10 µm) PM<sub>2.5</sub>, BC (black carbon) and OC (organic carbon) by country and sector (Janssens-Maenhout et al., 2015). Here we focus on the 6 major anthropogenic emission sectors contributing to global PM<sub>2.5</sub> concentrations, namely the power generation (“power”), non-power industry, industrial processes and product use (“industry”), ground transportation (“transport”), residential combustion and waste disposal (“residential”), agriculture (“agriculture”) and international shipping (“ship”). International and domestic aviation emissions are not considered in this study due to the lower contribution to air pollution compared to other anthropogenic sectors. It should be noted that agricultural emissions do not include agricultural waste burning and forest and savannah fires. Details on the emissions included in each aggregated sector can be found in Janssens-Maenhout et al. (2015). In addition to the reference HTAP\_v2.2 emissions for the year 2010, a set of emission perturbation scenarios has been created by subtracting from the reference dataset the emissions of each sector.

## 2.3 Emission inventory uncertainties

In order to investigate how computed PM<sub>2.5</sub> concentrations are affected by the uncertainty of emission inventories, we perform a sensitivity analysis testing the upper and lower range of HTAP\_v2.2 emissions including their uncertainties. Aggregated emissions of a certain pollutant

$p$ , from a sector  $i$  and country  $c$  are calculated as the product of activity data (AD) and emission factors (EF), therefore the corresponding uncertainty ( $\sigma_{i,c,p}$ ) is calculated as following:

$$\sigma_{EMI\ i,c,p} = \sqrt{\sigma_{ADi,c}^2 + \sigma_{EF,i,p,c}^2} \quad (\text{Eq.4})$$

where  $\sigma_{AD}$  and  $\sigma_{EF}$  are the uncertainties (%) of the activity data and emission factors for a certain sector, country and pollutant. Uncertainty values of the activity data by sector and country are obtained from Table 2 of Janssens-Maenhout et al. (2017, in review) and Olivier et al. (2016). Using this approach, the uncertainty in the global total anthropogenic CO<sub>2</sub> emissions is estimated to range from -9% to +9% (95% confidence interval), which is the result from larger uncertainties of about  $\pm 15\%$  for non-Annex I countries, whereas uncertainties of less than  $\pm 5\%$  are obtained for the 24OECD90 countries for the time series from 1990 (Olivier et al, 2016) reported to UNFCCC. Uncertainty values for the emission factors of gaseous pollutants are retrieved from the EMEP/EEA Guidebook (2013) and Bond et al. (2004) for particulate matter. In this work we assume that reported countries emissions are based on independent estimations of activity data and emission factors EFs, hence no cross-country correlation structure is assumed. This is in contrast to bottom-up gridded emission inventories like EDGAR, where the use of global activity datasets may lead to correlated errors between countries.

Therefore, we can calculate the overall uncertainty  $\sigma_{EMI\ p,c}$  for a certain pollutant ( $p$ ) due to all sectors ( $i$ ) in a specific country ( $c$ ) with the following equation (EMEP/EEA, 2013).

$$\sigma_{EMI\ p,c} = \sqrt{\sum_i \left( \sigma_{EMI\ i,c,p} * \frac{EMI_{i,c,p}}{EMI_{tot,c,p}} \right)^2} \quad (\text{Eq. 5})$$

where  $EMI_{i,c,p}$  (in kton) represents the emission of a certain pollutant in a certain country from a specific sector ( $i$ ) and  $EMI_{tot,c,p}$  (in kton) the corresponding emissions from all sectors for that country and pollutant.

Table S3, reports the overall uncertainty calculated for each pollutant and for each TM5-FASST region. Using an additional constraint that EFs and activities cannot be negative, a lognormal distribution of the calculated uncertainties is assumed (Bond et al., 2004). Therefore we can calculate the upper and lower range of emission estimates multiplying and dividing the reference emissions by  $(1+\sigma_{p,c})$ , respectively. We do not account for the uncertainties of the atmospheric transport model and the uncertainties due to aggregation, which are larger over smaller TM5-FASST regions. Based on the upper and lower emission range per region, new TM5-FASST model runs have been performed per source region to retrieve the corresponding range of concentrations in receptor regions (therefore the total number of computations is  $56*2$  for the uncertainty analysis).

### 3 TM5-FASST modelling results

#### 3.1 Regional contributions to PM<sub>2.5</sub> concentrations

Figure 1 provides a global perspective on the fraction of within-region and extra-regional PM<sub>2.5</sub> concentrations for 10 aggregated world receptor regions using emissions of the year 2010, with the extra-regional fraction (RERER metric) broken down into source region contributions. Annual average population weighted anthropogenic PM<sub>2.5</sub> concentrations (refer to Van Dingenen et al., (2018) for the calculation of this metric) ranged from few  $\mu\text{g}/\text{m}^3$  (e.g. in Oceania or Latin America), around 7-8  $\mu\text{g}/\text{m}^3$  for North America and Europe, and up to 33-39  $\mu\text{g}/\text{m}^3$  in China+ (including also Mongolia) and India+ (including also the rest of South Asia). Anthropogenic PM<sub>2.5</sub> pollution in China+ and India+ is mainly affected by large emission sources within the country (98 and 96%, respectively), although 4 % of the Indian anthropogenic PM<sub>2.5</sub> pollution is mainly transported from the Gulf region and Middle East. North America (98%) and Oceania (98%) are mainly influenced by within-regional pollution due to their geographical isolation from other regions. TM5-FASST computations attributed 11 % of the PM<sub>2.5</sub> in Europe to extra-regional sources; for the Middle East and Gulf region extra-regional contributions amount to 18% (mainly from Europe and Russia), for Africa 25% (mainly from Europe and Middle East), and Russia 28% (mainly from Europe, Middle East and Gulf region and China). Shipping emissions are not considered in this figure due to their international origin, while inland waterways emissions are still included in the ground transport sector. Transboundary air pollution is known to be an important issue in the rest of Asia, in particular for pollution transported from China to Korea and Japan (Park et al., 2014) and we estimate that the contribution of transported PM is up to 40% in South Eastern Asia (mainly from China and India). Within-region and extra-regional PM<sub>2.5</sub> concentrations for all the TM5-FASST regions are reported in Table S2.

Focusing on Europe, Fig. 2 shows within-region (in black) vs. extra-regional absolute population-weighted PM<sub>2.5</sub> concentrations (in  $\mu\text{g}/\text{m}^3$ ) for 16 EU countries plus Norway and Switzerland, defined in TM5-FASST, as well as the source regions contributing to this pollution. Regional annual averages of population weighted PM<sub>2.5</sub> concentrations in Europe vary between 2-4  $\mu\text{g}/\text{m}^3$  in Northern European countries (like Finland, Norway and Sweden) up to 10-12  $\mu\text{g}/\text{m}^3$  for continental Europe. Although most of EU annual average PM<sub>2.5</sub> concentrations are below the World Health Organization Air Quality Guideline of 10  $\mu\text{g}/\text{m}^3$  PM<sub>2.5</sub> (as annual average), these values represent only regional averages while several exceedances in urban areas are often observed in Europe. As further discussed in Sect. 3.2, an additional contribution to PM<sub>2.5</sub> concentrations comes from the shipping sector, mainly influencing Mediterranean countries (like Italy, Spain and France) and countries facing the North Sea, Baltic Sea and Atlantic Ocean (e.g. Benelux, Sweden, Great Britain, etc.). Transboundary air pollution from external regions contributes by 27% to 75 % and on average by 51 % to PM<sub>2.5</sub> pollution in European countries. Countries surrounded by oceans, are mainly influenced by within-region pollution due to their geographical isolation from other source regions (e.g. Italy, Spain, Great Britain and Norway); therefore the fraction of extra-regional pollution ranges from 27% to 35%. The largest extra-regional contributions are calculated for Hungary (75%, mainly from Austria, Czech Republic, Rest of Central EU, Poland and Germany), Czech Republic (67%, mainly from Poland, Germany and Austria), Austria and Slovenia (66%, mainly from Czech Republic, Germany and Italy), Sweden+Denmark (65%, mainly from Germany, Norway and Poland),

Bulgaria (63%, mainly from Romania), and Greece (61%). The remaining EU countries are both affected by within-region and extra-regional pollution (the latter ranging from 40% to 59%), highlighting the importance of transboundary transport of PM<sub>2.5</sub> concentrations. For example Switzerland is influenced by the pollution coming from France, Italy and Germany; Rest of Central EU by Poland and Germany; Germany by France and Benelux; Poland by Czech Republic and Germany. Interestingly, Romania, Bulgaria, Greece and Hungary are also significantly affected by the pollution transported from Ukraine and Turkey, which is included in the “rest of the world” contribution of Fig. 2. Our results are consistent with the findings of the latest UNECE Scientific Assessment Report (Maas and Grennfelt, 2016), which highlights the importance of transboundary transport of organic and inorganic PM.

### 3.2 Sectorial contributions to PM<sub>2.5</sub> concentrations

Figure 3 shows the relative sectorial contributions to anthropogenic PM<sub>2.5</sub> concentrations for the 56 TM5-FASST receptor regions, separating the fraction of extra-regional (RERER) (shaded colors) and within-region pollution, while Table 1 shows regional average values of sector-specific relative contributions. In most African regions (except Egypt) anthropogenic PM<sub>2.5</sub> concentrations are mainly produced by emissions in the residential sector. Agriculture is an important sector for Egypt, while Northern Africa is strongly influenced by shipping emissions in the Mediterranean (30%). PM<sub>2.5</sub> in emerging economies in Asia, Latin America and Middle East are dominated by PM<sub>2.5</sub> concentrations from the residential sector, power generation and industrial. Asian countries, China, India, Indonesia and Philippines are mainly influenced by within-region pollution with the largest contributions coming from power, industry and residential sectors. Japan is characterised by the contribution of local sources like transport and agriculture but it is also affected by transported pollution from China, especially from the industrial sector. Anthropogenic PM<sub>2.5</sub> in the remaining Asian countries is influenced by more than 50% by the pollution coming from China (e.g. Vietnam, Malaysia, Thailand, Mongolia, South Korea, Taiwan) or India (e.g. Rest of South Asia and South Eastern Asia) from the power, industry and residential activities. A different picture is seen for Europe where according to our calculations, annual PM concentrations stem mainly from the agricultural and residential sectors with a somewhat lower contribution from the transport sector. In Eastern European countries noticeable contributions are also found from the power and industrial sectors due to the relatively extensive use of polluting fuels like coal. PM<sub>2.5</sub> concentrations in USA and Canada are mostly from the power, industry and agricultural sectors. In Oceania industry and agriculture are the most important sectors. PM<sub>2.5</sub> from ship emissions mainly affect coastal areas of North Africa, SE Asia (e.g. in Japan, Taiwan, Malaysia, Indonesia and Philippines), Mediterranean countries (Spain 11%, Italy 5%, France 7% of their corresponding country totals), Northern EU regions (Great Britain 10%, Norway 6%, Sweden and Denmark 10% of their corresponding country totals) and Oceania (22% of the regional total). Over the international areas of sea and air no distinction between within-region and extra-regional concentrations is reported. Further details on within-region and extra-regional concentrations can be found in section S2 of the Supplementary Material.

### 3.3 Gridded PM<sub>2.5</sub> concentrations

Figure 4 shows the global 1°x1° gridmaps of anthropogenic PM<sub>2.5</sub> concentrations in 2010 for the reference case as well as the contribution from each of the major anthropogenic emission sectors. Anthropogenic PM<sub>2.5</sub> is ubiquitous globally and covers a range from a µg/m<sup>3</sup> or less over the



oceans and seas to more than  $50 \mu\text{g}/\text{m}^3$  over Asia. As shown in Fig. 3, the most polluted countries in Asia are China, India and Rest of South Asia (which includes Afghanistan, Bangladesh, Bhutan, Nepal and Pakistan) with annual average anthropogenic  $\text{PM}_{2.5}$  concentrations ranging from  $29$  to  $40 \mu\text{g}/\text{m}^3$ ; Mongolia and North Korea, Vietnam, South Korea, Rest of South Eastern Asia (including Cambodia, Lao People's Democratic Republic and Myanmar), Thailand, Japan and Taiwan are rather polluted areas with  $\text{PM}_{2.5}$  concentration in the range of  $6$  to  $14 \mu\text{g}/\text{m}^3$ . The highest annual  $\text{PM}_{2.5}$  concentrations in Africa are computed in Egypt ( $11 \mu\text{g}/\text{m}^3$  as annual average), Republic of South Africa ( $6.1 \mu\text{g}/\text{m}^3$  as annual average) and Western Africa ( $4.0 \mu\text{g}/\text{m}^3$  as annual average). The highest pollution in Europe is observed in the Benelux region, Italy and in some of the Eastern countries (e.g. Romania, Bulgaria and Czech Republic), while in Latin America the most polluted areas are Chile ( $13.7 \mu\text{g}/\text{m}^3$  as annual average) and Mexico ( $4.2 \mu\text{g}/\text{m}^3$  as annual average). Middle East, the Gulf region, Turkey, Ukraine and former USSR are also characterised by  $\text{PM}_{2.5}$  concentrations ranging between  $7.5 \mu\text{g}/\text{m}^3$  and  $9.2 \mu\text{g}/\text{m}^3$  as annual averages.

The TM5-FASST model developed by van Dingenen et al. (2018) has been validated against concentration estimates derived from the WHO database (WHO, 2011, 2014, 2016) and satellite-based measurements (van Donkelaar et al., 2010, 2014). General good agreement is found between the  $\text{PM}_{2.5}$  concentrations modeled by TM5-FASST and the measured ones reported in the WHO database for Europe (within 20% deviation), North America (within 5% deviation) and partly China due to the higher accuracy of the measurements. The comparison for Latin America and Africa is much less robust (40-60% deviation from the 1:1 line) and the scatter possibly highlights a non-optimal modeling of specific sources relevant for these regions by TM5-FASST (e.g. large scale biomass burning) by the TM5-FASST model. Similar results are also found comparing regional averages of urban stations from WHO against the FASST population weighted average of grid cells. The TM5-FASST modeled  $\text{PM}_{2.5}$  concentrations have been compared to satellite products which are based on aerosol optical depth measurements together with chemical transport model information to retrieve from the total column the information of PM concentrations in the lowest layer of the atmosphere (Boys et al., 2014; van Donkelaar et al., 2010, 2014). The regional comparison shows consistent results with the ground based measurements comparison (e.g. good agreement for EU and USA within 10% deviation, while lower agreement for developing and emerging countries).

In our work, modelled  $\text{PM}_{2.5}$  concentrations are in the range of the measurements and satellite-based estimates provided in several literature studies (Brauer et al., 2012; Brauer et al., 2015; Boys et al., 2014; Evans et al., 2013; Van Donkelaar et al., 2016), reporting for the whole Europe annual averaged  $\text{PM}_{2.5}$  concentrations in the range between  $11$  and  $17 \mu\text{g}/\text{m}^3$ , for Asia from  $16$  to  $58 \mu\text{g}/\text{m}^3$ , Latin America  $7$ - $12 \mu\text{g}/\text{m}^3$ , Africa and Middle East  $8$ - $26 \mu\text{g}/\text{m}^3$ , Oceania  $6 \mu\text{g}/\text{m}^3$  and North America  $13 \mu\text{g}/\text{m}^3$  (note that measurements and satellite estimates would not separate anthropogenic and natural sources of PM, e.g. dust, large scale biomass burning, while the concentrations in this study consider anthropogenic emissions alone).

In order to understand the origin of global  $\text{PM}_{2.5}$  concentrations, we look at sector specific maps (Fig. 4). The power and industrial sectors are mainly contributing to PM concentrations in countries having emerging economies and fast development (e.g. Middle East, China and India), while the ground transport sector is a more important source of PM concentrations in industrialised countries (e.g. North America and Europe) and in developing Asian countries. The residential sector is an important source of PM all over the world, also affecting indoor air

quality (Ezzati, 2008; Lim et al., 2013; Chafe et al., 2014). Africa and Asia are strongly influenced by PM concentrations produced by this sector due to the incomplete combustion of rather dirty fuels and solid biomass deployed for domestic heating and cooking purposes. Interestingly, the agricultural sector is affecting pollution in Asia as well as in Europe (Backes et al., 2016; Erisman et al., 2004) and North America, confirming the findings of the UNECE Scientific Assessment Report and several other scientific publications (Maas and Grennfelt, 2016; Pozzer et al., 2017; Tsimpidi et al., 2007; Zhang et al., 2008). The residential and agriculture sectors are less spatially confined, and emissions more difficult to be effectively regulated than point source emissions of the industrial and power sectors (e.g. in Europe the Large Combustion Plant Directive, the National Emission Ceilings or the Industrial Emissions, the Euro norms for road transport, etc.). Finally, shipping is mainly contributing to the pollution in countries and regions with substantial coastal areas, and with ship tracks on the Mediterranean Sea, the Atlantic, Pacific and Indian Oceans, as depicted in Fig. 4.

### 3.4 Uncertainty from emissions

#### 3.4.1 Propagation of emission uncertainties to anthropogenic PM<sub>2.5</sub> concentrations

Table 2, as well as Fig. 5, report the annual average anthropogenic PM<sub>2.5</sub> concentrations ( $\mu\text{g}/\text{m}^3$ ) estimated by TM5-FASST with the uncertainty bars representing the upper and lower range of concentrations due to emission inventories uncertainty. The extra-regional contribution to uncertainty is also addressed as well as the contribution of the uncertainty of primary particulate matter emissions to the upper range of PM<sub>2.5</sub> concentrations (Table 2). We estimate that primary PM emissions represent the dominant source of uncertainties, contributing from 45% to 97% to the total uncertainty in anthropogenic PM<sub>2.5</sub> concentrations for each country/region.

Figure 5 depicts the results of the propagation of the lowest and highest range of emissions including their uncertainty to PM<sub>2.5</sub> concentrations in Asia (Fig 5a) and - in more detail- Europe (Fig 5b), highlighting the contribution of within-region and extra-regional PM<sub>2.5</sub> concentrations and uncertainties (error bars). Due to their large sizes, Indian and Chinese PM<sub>2.5</sub> concentrations and uncertainties are mainly affected by uncertainties from the residential, transport and agricultural sectors within these countries. Interestingly, in South Eastern and Eastern Asia uncertainties in PM<sub>2.5</sub> are strongly influenced by the Indian residential emissions. On the other hand, PM<sub>2.5</sub> in Thailand, Japan, Taiwan, South Korea, Mongolia and Vietnam are strongly affected by the uncertainty in the Chinese residential and industrial emissions. Consequently reducing the uncertainties in the Chinese and Indian emission inventories will help improving the understanding the long-range contribution of PM<sub>2.5</sub> pollution in most of Asian countries.

In Europe, the highest uncertainties in PM<sub>2.5</sub> concentrations are associated with the emissions from the residential, agriculture and transport sectors. In most of the Central and Eastern European countries modelled PM<sub>2.5</sub> is strongly affected by the uncertainty of transported extra-regional pollution, produced from the residential, agricultural and transport sectors. Conversely, uncertainties in Norway are dominated by national emissions, mainly from the residential and transport sectors, and in Italy from the residential and agriculture sectors. The remaining European countries are affected both by within-country and imported uncertainties. Fig. 5c represents the results of the propagation of the emissions range including their uncertainty to PM<sub>2.5</sub> concentrations for North America, Latin America, Oceania and Russia, while Fig 5d displays emission uncertainties for Africa, Middle East and the Gulf region. The uncertainty in

the USA agricultural and residential emissions affect more than 50% of modelled Canadian PM<sub>2.5</sub> concentrations and the uncertainty in Mexico and Argentina is influenced by similar magnitudes (30-50%) by neighbouring countries. The uncertainty in within-region emissions, especially from the residential sector, dominates the overall levels of PM<sub>2.5</sub> uncertainties in Latin America. However, in addition, Chili's own agriculture and power sectors contribute significantly to the overall uncertainty levels. PM<sub>2.5</sub> levels in most of the African regions are strongly affected by the uncertainty in their own residential emissions, while in Egypt they are mostly influenced by the agricultural sector uncertainties (refer to Fig. 5d). Interestingly, anthropogenic PM<sub>2.5</sub> in Northern Africa is influenced by uncertainties in Italian emissions uncertainty as well as those from shipping emissions. Conversely, the Middle East and Turkey regions are influenced by a range of extra-regional emission uncertainties (e.g. Middle East is affected by the uncertainty of Turkey, Egypt and the Gulf region, while Turkey by Bulgaria, Gulf region and rest of Central EU).

### 3.4.2 Ranking the sector specific contribution to emission uncertainties

Figure 6 shows the average sector relative contribution to total emission inventory related uncertainty for the main PM<sub>2.5</sub> concentration precursors and world regions. These contributions can be interpreted as a ranking of the most effective improvements to be taken regionally to better constrain their inventories and reduce the final formation of PM<sub>2.5</sub> concentrations. The complete overview of all TM5-FASST regions is provided in Fig. S2, where the share of each

term of the sum of Eq. 5  $\left( \sigma_{EMI_{i,c,p}} * \frac{EMI_{i,c,p}}{EMI_{tot,c,p}} \right)^2$ , representing the sector contribution to the uncertainty of each pollutant in each region, is reported. SO<sub>2</sub> uncertainties mainly derive from the power generation sector especially countries with a dominant coal use; however, substantial contributions are also computed for the industrial sector in South Africa, Asia, Norway, some Latin American countries, Canada and Russian countries. Interestingly, for SO<sub>2</sub> some contributions are also observed from the residential sector in Africa and from the transport sector in some Asian countries (e.g. Korea, Vietnam, Indonesia, South Eastern Asia, etc.). Smith et al. (2011) report a range of regional uncertainty for SO<sub>2</sub> emissions up to 30%, while our estimates are slightly higher (up to 50%). NO<sub>x</sub> emissions uncertainty mainly stems from the transport sector, although some contributions are also seen from power generation in Russia, countries strongly relying on gas (e.g. Russia), the Middle East and the residential sector in Africa. Depending on the region, CO uncertainty (not shown) is dominated by either the transport or residential (particularly in Africa and Asia) sectors and for some regions by a similar contribution of these two sectors. NMVOC emission uncertainties mainly derive from poorly characterized industrial, transport and residential activities due to the complex mixture and reactivity of such pollutants. As expected, NH<sub>3</sub> emission uncertainty is dominated by the agricultural sector which appears to be less relevant for all other pollutants. Among all air pollutants, primary PM<sub>2.5</sub> represents one of the most uncertain pollutant due to very different combustion conditions, different fuel qualities and lack of control measures (Klimont et al., 2017).

Primary particulate matter emissions should be mainly improved for the residential, transport and in particular industrial sectors. Black carbon emission inventories should be better characterised in Europe, Japan, Korea, Malaysia etc. for the transport sector, where the higher share of diesel

used as fuel for vehicles leads to higher BC emissions; in addition, BC emissions from the residential sector require further effort to better define EFs for the different type of fuels used under different combustion conditions. To constrain and improve particulate organic matter emissions, efforts should be dedicated to improve residential emissions estimates. Therefore, in the following section, we try to assess one of the major sources of uncertainty in the residential emissions in Europe which is the use of solid biofuel.

### 3.4.3 Assessing the uncertainty in household biofuel consumption with an independent inventory in Europe

The combustion of solid biomass (i.e. biofuel) for household heating and cooking purposes is one of the major sources of particulate matter emissions in the world. Wood products and residues are widely used in the residential sector, but national reporting often underestimates the emissions from this sector, due to the fact that often informal economic wood sales are not accurately reflected in the official statistics of wood consumption (AD) (Denier Van Der Gon et al., 2015). An additional uncertainty is related to the lack of information in the inventory regarding the emission factors (EF) variability, which depends on the combustion efficiency and type of wood (Weimer et al., 2008; Chen et al., 2012). In our work we estimate the uncertainty attributable to wood combustion in the residential sector ( $\sigma_{AD,RES,bio}$ ) by comparing it to the recent TNO RWC (residential wood combustion) inventory of Denier van der Gon et al. (2015), which includes a revised biomass fuel consumption with the corresponding EDGARv4.3.2 activity data (Janssens-Maenhout et al., 2017), as shown in Table S4. In the TNO RWC inventory, wood use for each country has been updated comparing the officially reported per capita wood consumption data (from GAINS and IEA) with the expected specific wood use for a country including the wood availability information (Visschedijk et al., 2009; Denier Van Der Gon et al., 2015). We can therefore assume that the TNO RWC inventory represents an independent estimate of wood consumption in the residential sector, allowing a more precise uncertainty estimation of the AD for this sector. Assuming that emissions are calculated as the product of AD and EF, the corresponding uncertainty can be calculated with Eq. 4, where  $\sigma_{AD}$  ranges from 5 to 10% for European countries and Russia as reported for international statistics (Olivier et al., 2016). We can therefore calculate the residential emission factors uncertainty of each individual pollutant ( $\sigma_{EF,p}$ ) from Eq. 4. In addition, based on the comparison of the recent estimates of wood consumption provided by TNO RWC AD, which should match better with observations and the EDGARv4.3.2 ones, we can evaluate the mean normalized absolute error (MNAE) considering all  $N$  countries, following Eq. 6 (Yu et al., 2006), which represents our estimate of  $\sigma_{AD,RES,bio}$ .

$$MNAE = \frac{1}{N} * \sum_j^N \frac{|TNO\ RWC_j - EDGARv4.3.2_j|}{TNO\ RWC_j} \quad (Eq.6)$$

We estimate a value of  $\sigma_{AD,RES,bio}$  of 38.9% which is much larger compared to the 5-10% uncertainty reported for the fuel consumption of the international statistics ( $\sigma_{AD}$ ). The issue of biofuel uncertainty mainly affects rural areas where wood is often used instead of fossil fuel.

Then, using Eq. 4 and the calculated  $\sigma_{AD,RES,bio}$  and  $\sigma_{EF,p}$ , we can evaluate a new  $\sigma_{EMI,p,RES,bio}$

for the residential sector including the uncertainty of the AD due to the use of wood as fuel for this sector, as reported in Table S5. Comparing the results shown in Table S5 with the factor of two uncertainty values expected for PM emissions from the residential sector (Janssens-Maenhout et al., 2015), we derive that the uncertainty associated with the emission factors for biomass combustion in the residential sector is the dominant source of uncertainty compared to the uncertainty in wood burning activity data. Large increases in reported biomass usage for domestic use has been noted in IEA energy statistics for some European countries (IEA, 2013,2014,2015,2016) and further increases are expected as countries are shifting their methodologies to estimate biofuel activity data away from fuel sales statistics to a modelling approach based on energy demand. In addition, several EU countries are increasing the use of biomass in order to accomplish the targets set in the context of the renewable energy directive (2009/28/EC) as reported in their national renewable energy action plans (<http://ec.europa.eu/energy/node/71>). When comparing the UNFCCC and the TNO RWC data, a higher value of  $\sigma_{AD,RES_{bio}}$  is obtained (59.5% instead of 38.9%), although its effect on the final residential emission uncertainty is less strong, as shown in Table S6. Table 3 shows the impact of biofuel combustion uncertainty in the residential sector on PM<sub>2.5</sub> concentrations. Upper-end uncertainties indicate that PM<sub>2.5</sub> concentrations could be between 2.6 and 3.7 times larger than those derived from the HTAP\_v2.2 inventory.

#### 4 Health impact assessment

Annual population weighted PM<sub>2.5</sub> concentrations represent the most robust and widely used metric to analyse the long-term impacts of particulate matter air pollution on human health (Pope and Dockery, 2006; Dockery, 2009). The mortality estimation in TM5-FASST is based on the integrated exposure-response functions defined by Burnett et al. (2014). The increased risk from exposure to air pollution is estimated using exposure-response functions for five relevant deaths causes, namely Ischemic heart disease (IHD), Cerebrovascular Disease (CD, stroke), Chronic Obstructive Pulmonary Disease (COPD), Lung Cancer (LC), Acute Lower Respiratory Infections (ALRI). The relative risk (RR) represents the proportional increase in the assessed health outcome due to a given increase in PM<sub>2.5</sub> concentrations (Burnett, 2014).

In this section, we investigate the impact of total and sector-specific anthropogenic population weighted PM<sub>2.5</sub> concentrations on health and we show comparisons with mortality estimates provided by WHO and scientific publications (Silva et al., 2016). Figure 7 represents the premature deaths (PD) distribution due to air pollution, using population weighted PM<sub>2.5</sub> concentrations and representative for anthropogenic emissions in the year 2010. The most affected areas are China and India, but also some countries of Western Africa and urban areas in Europe (in particular in the Benelux region and Eastern Europe). Our computations indicate that annual global outdoor premature mortality due to anthropogenic PM<sub>2.5</sub> amounts to 2.1 million premature deaths, with an uncertainty range related to emission uncertainty of 1-3.3 million deaths/year. In our work we only evaluate how the uncertainty of emission inventories influences the health impact estimates focusing on the interregional aspects (i.e. we do not evaluate effects of misallocation of sources within regions) and not all the other sources of uncertainties, such as the uncertainty of concentration-response estimates, of air quality models used to estimate particulate matter concentrations, etc. An overview of the propagation of the uncertainty associated with an ensemble of air quality models to health and crop impacts is provided by Solazzo et al. (2018, submitted). Solazzo et al. find in their analysis over the European countries

a mean number of PDs due to exposure to PM<sub>2.5</sub> and ozone of approximately 370 thousands (inter-quantile range between 260 and 415 thousand). Moreover, they estimate that a reduction in the uncertainty of the modelled ozone by 61% - 80% (depending on the aggregation metric used) and by 46% for PM<sub>2.5</sub>, produces a reduction in the uncertainty in premature mortality and crop loss of more than 60%. However, we show here that the often neglected emission inventories' uncertainty provides a range of premature deaths of  $\pm 1.1$  million at the global scale, which is in the same order of magnitude of the uncertainty of air quality models and concentration-response functions (Cohen et al., 2017). In 2010, using our central estimate, 82% of the PDs occur in fast growing economies and developing countries, especially in China with 670 thousand and India with an almost equal amount of 610 thousand PD/year. Table 4 summarizes our estimates of premature mortality for aggregated world regions, with Europe accounting for 210 thousand PD/year and North America 100 thousand PD/year.

Our results are comparable with Lelieveld et al. (2015) and Silva et al. (2016) who, using the same Burnett et al. (2014) methodology, estimate a global premature mortality of 2.5 and 2.2 million people, respectively, due to air quality in 2010 for the same anthropogenic sectors. However, a recent work published by Cohen et al. (2017) estimates a higher value of global mortality (3.9 million PD/year) mainly due to a lower minimum risk exposure level set in the exposure response function, the inclusion of the urban increment calculation and the contribution of natural sources. When comparing mortality estimates we need to take into account that several elements affect the results, like the resolution of the model, the urban increment subgrid adjustment (including information on urban and rural population, refer to van Dingenen et al. 2018), the inclusion or not of natural components, the impact threshold value used, and RR functions. In this study we use the population weighted PM<sub>2.5</sub> concentration (excluding natural components) at 1x1 degree resolution as metric for estimating health effects due to air, with a threshold value of 5.8  $\mu\text{g}/\text{m}^3$ , no urban increment adjustment, and relative risk functions accordingly with Burnett et al. (2014). We also estimate that 7 % of the global non accidental mortalities from the Global Burden of Disease (<http://vizhub.healthdata.org/gbd-compare>; Forouzanfar et al. (2015)) are attributable to air pollution in 2010; 8.6% of total mortality in Europe is due to air pollution, ranging from less than 1% up to 17% depending on the country; similarly, Asian premature mortality due to air quality is equal to 8.7% of total Asian mortality, with 10.6% contribution in China and 8.5% in India. Lower values are found for African countries and Latin America where other causes of mortalities are still dominant compared to developed countries.

Table 5 shows the number of premature deaths for each receptor region, highlighting the premature mortality induced within the country itself and outside the receptor region. The PD induced by Chinese and Indian emissions are mainly found within these two countries; however, the annual PDs caused by China and India in external regions contribute for ca 700 thousand and ca 500 thousand PD/year, respectively, representing more than 50% of the global mortality. Clearly, reducing emissions and emission uncertainties in these two regions will have therefore the largest over-all benefit on global air quality improvement and understanding as well as on global human health. For most of the TM5-FASST regions, PDs due to anthropogenic emissions within the source region are higher than the extra-regional contributions. However, there are marked exceptions, such as the Gulf region, Hungary, Czech Republic, Mongolia, etc., where the extra-regional and within-region contributions to mortality are at least comparable. In fact Hungary and Czech Republic are strongly influenced by polluted regions in Poland (mainly);

likewise Mongolia is suffering from the vicinity of source in China. The Gulf region produces a lot of its own pollution, but is also influenced by transport from Africa and Eurasia as reported by Lelieveld et al. (2009).

Detailed information on the premature deaths for each TM5-FASST region and the contributing anthropogenic emission sectors is shown in Figs. 8a and 8b. Health effects induced by air quality in industrialized countries are mainly related with agriculture (32.4% of total mortality or 68 thousand PD/year), residential combustion (17.8% or 37 thousand PD/year) and road transport (18.7% or 39 thousand PD/year) for Europe and with power generation (26.4% or 26 thousand PD/year), industry (19% or 19 thousand PD/year), residential (17% or 17 thousand PD/year) and agriculture (24.0% or 24 thousand PD/year) for North America. The health impacts observed in most Western EU countries is due both to within-regions and extra-regional pollution, while in several Eastern EU countries the impact of neighbouring countries is even larger compared to within-region pollution. The premature deaths induced by international shipping emissions represent 5.5% of total EU PD, in the range the results of Brandt et al. (2013a) (ca 50 thousand PDs). PM related mortality in developing countries and fast growing economies is mostly affected by industrial (up to 42% in China or 279 thousand PD/year) and residential activities (ranging from 27% in China and 76% in Western Africa), and also by power generation (up to 24% in India or 113000 PD/year). Chinese emissions have a strong impact on China, Japan, Vietnam, Mongolia+Korea, Thailand while the Indian emissions impact the rest of South and South Eastern Asia. Reducing Chinese and Indian emissions will reduce the PM related mortality in almost all countries in Asia. Our results are in agreement with the study of Oh et al. (2015) where they highlight the role of transported pollution from China in affecting Korean and other South Eastern Asian countries PM<sub>2.5</sub> concentrations and health effects, as well as the need of international measures to improve air quality.

## Conclusions

We coupled the global anthropogenic emission estimates provided by the HTAP\_v2.2 inventory for 2010 (merging national and regional inventories) to the global source receptor model TM5-FASST, to study PM<sub>2.5</sub> concentrations and the corresponding health impacts, including an evaluation of the impacts of uncertainties in national emission inventories. Annual and regionally averaged anthropogenic PM<sub>2.5</sub> concentrations, corresponding to the 2010 emissions, vary between ca 1 and 40 µg/m<sup>3</sup>, with the highest annual concentrations computed in China (40 µg/m<sup>3</sup>) India (35 µg/m<sup>3</sup>), Europe and North America (each 8 µg/m<sup>3</sup>). Anthropogenic PM<sub>2.5</sub> concentrations are mainly due to emissions within the source region, but extra-regional transported air pollution can contribute by up to 40%, e.g. from China to SE Asia, from EU to Russia, etc.). Moreover, due to the transport of PM between European countries, EU wide directives can help improving the air quality across Europe.

For our analysis we aggregate our results derived from 56 TM5-FASST source regions, into 10 global regions to facilitate the comparison of results in regions of more equal size. The relative contribution of anthropogenic sectors to PM<sub>2.5</sub> concentrations varies in different regions. In Europe in 2010, the agriculture and residential combustion sectors contribute strongest to PM<sub>2.5</sub> concentrations and these sectors are also associated with relatively large emission uncertainties. PM<sub>2.5</sub> concentrations in China and other emerging economies are predominantly associated with the power generation, industry and residential activities.

Using the HTAP\_v2.2 emission inventory and TM5-FASST, we also evaluate how the uncertainty in sectors and regions propagates into PM<sub>2.5</sub>. The aim of our analysis is to provide insights on where the emission inventories of each country could be improved, because of their highest uncertainty and highest contribution to the formation of PM<sub>2.5</sub> concentrations. The uncertainty of PM concentrations depends in variable proportions to the uncertainties of the emissions within receptor regions, and surrounding regions. We show that reducing the uncertainties in the Chinese and Indian emission inventories (e.g. from industry and residential sectors) will be highly relevant for understanding the long-range sources of PM<sub>2.5</sub> pollution in most of Asian countries. Here we demonstrate how analysis of uncertainties in national/regional sectorial emission inventories can further inform coordinated transboundary and sector-specific policies to significantly improve global air quality. Among all anthropogenic emission sectors, the combustion of biomass for household purposes represents one of the major sources of uncertainties in emission inventories both in terms of wood consumption and emission factor estimates. Further effort is therefore required at national level to better characterize this source.

Finally, we analyse the air quality effects on health. Global health effects due to PM<sub>2.5</sub> concentrations calculated with TM5-FASST and anthropogenic emissions in 2010 are estimated to be ca 2.1 million premature deaths/year, but the uncertainty associated with emission ranges between 1-3.4 million deaths/year, of which the largest fraction (82%) occurs in developing countries.

## References

<http://www.worldbank.org/en/news/infographic/2016/09/08/death-in-the-air-air-pollution-costs-money-and-lives>, latest access: February 2018.

<http://edgar.jrc.ec.europa.eu/overview.php?v=42FT2010>, latest access: February 2018.

Institute for Health Metrics and Evaluation (IHME). GBD Compare. Seattle, WA: IHME, University of Washington, 2015. Available from <http://vizhub.healthdata.org/gbd-compare>. (Accessed 07-Jul-2016).

Anderson, J., Thundiyil, J., and Stolbach, A.: Clearing the Air: A Review of the Effects of Particulate Matter Air Pollution on Human Health, *J. Med. Toxicol.*, 8, 166-175, 10.1007/s13181-011-0203-1, 2012.

Anenberg, S. C., Schwartz, J., Vignati, E., Emberson, L., Muller, N. Z., West, J. J., Williams, M., Demkine, V., Hicks, W. K., and Kuylensstierna, J.: Global air quality and health co-benefits of mitigating near-term climate change through methane and black carbon emission controls, 2012.

Bond, T. C., Streets, D. G., Yarber, K. F., Nelson, S. M., Woo, J.-H., and Klimont, Z.: A technology-based global inventory of black and organic carbon emissions from combustion, *Journal of Geophysical Research: Atmospheres*, 109, D14203, 10.1029/2003jd003697, 2004.

Boys, B., Martin, R., Van Donkelaar, A., MacDonell, R., Hsu, N., Cooper, M., Yantosca, R., Lu, Z., Streets, D., and Zhang, Q.: Fifteen-year global time series of satellite-derived fine particulate matter, *Environmental Science & Technology*, 48, 11109-11118, 2014.



1 Brauer, M., Amann, M., Burnett, R. T., Cohen, A., Dentener, F., Ezzati, M., Henderson, S. B.,  
2 Krzyzanowski, M., Martin, R. V., and Van Dingenen, R.: Exposure assessment for estimation of  
3 the global burden of disease attributable to outdoor air pollution, *Environ. Sci. Technol*, 46, 652-  
4 660, 2012.

5 Brauer, M., Freedman, G., Frostad, J., Van Donkelaar, A., Martin, R. V., Dentener, F., Dingenen,  
6 R. v., Estep, K., Amini, H., and Apte, J. S.: Ambient air pollution exposure estimation for the  
7 global burden of disease 2013, *Environmental Science & Technology*, 50, 79-88, 2015.

8 Burnett, R. T., C. A. Pope, M. Ezzati, C. Olives, S. S. Lim, S. Mehta, H. H. Shin, Hwashin H.,  
9 Singh, G., Hubbell, B., Brauer, M., Anderson, H. R., Smith, K. R., Balmes, J. R., Bruce, N. G.,  
10 Kan, H., Laden, F., Prüss-Ustün, A., Turner, M. C., Gapstur, S. M., Diver, W. R., Cohen, A.: An  
11 Integrated Risk Function for Estimating the Global Burden of Disease Attributable to Ambient  
12 Fine Particulate Matter Exposure, *Environmental Health Perspectives*, 122(4),397-403  
13 doi:10.1289/ehp.1307049 2014.

14 Chafe, Z. A., Brauer, M., Klimont, Z., Van Dingenen, R., Mehta, S., Rao, S., Riahi, K.,  
15 Dentener, F., and Smith, K. R.: Household Cooking with Solid Fuels Contributes to Ambient  
16 PM(2.5) Air Pollution and the Burden of Disease, *Environmental Health Perspectives*, 122,  
17 1314-1320, 10.1289/ehp.1206340, 2014.

18 Chen, Y., Roden, C. A., and Bond, T. C.: Characterizing biofuel combustion with patterns of  
19 real-time emission data (PaRTED), *Environmental Science and Technology*, 46, 6110-6117,  
20 2012.

21 Cohen, A. J., Brauer, M., Burnett, R., Anderson, H. R., Frostad, J., Estep, K., Balakrishnan, K.,  
22 Brunekreef, B., Dandona, L., Dandona, R., Valery, F., Greg, F., Bryan, H., Amelia, J., Haidong,  
23 K., Luke, K., Yang, L., Randall, M., Lidia, M., C Arden, P. I., Hwashin, S., Kurt, S., Gavin, S.,  
24 Matthew, T., Rita, v. D., Aaron, v. D., Theo, V., Christopher J L, M., and Mohammad H, F.:  
25 Estimates and 25-year trends of the global burden of disease attributable to ambient air pollution:  
26 an analysis of data from the Global Burden of Diseases Study 2015, *The Lancet*, 389, 1907-  
27 1918, 2017.

28 Denier Van Der Gon, H., Bergström, R., Fountoukis, C., Johansson, C., Pandis, S., Simpson, D.,  
29 and Visschedijk, A.: Particulate emissions from residential wood combustion in Europe–revised  
30 estimates and an evaluation, *Atmospheric Chemistry and Physics*, 15, 6503-6519, 2015.

31 Dentener, F., Kinne, S., Bond, T., Boucher, O., Cofala, J., Generoso, S., Ginoux, P., Gong, S.,  
32 Hoelzemann, J., and Ito, A.: Emissions of primary aerosol and precursor gases in the years 2000  
33 and 1750 prescribed data-sets for AeroCom, *Atmospheric Chemistry and Physics*, 6, 4321-4344,  
34 2006.

35 Dockery, D. W.: Health effects of particulate air pollution, *Annals of epidemiology*, 19, 257-263,  
36 2009.

37 EMEP/EEA: EMEP/EEA air pollutant emission inventory guidebook 2013, European  
38 Environment Agency, Copenhagen, 2013.

1 Evans, J., van Donkelaar, A., Martin, R. V., Burnett, R., Rainham, D. G., Birkett, N. J., and  
2 Krewski, D.: Estimates of global mortality attributable to particulate air pollution using satellite  
3 imagery, *Environmental research*, 120, 33-42, 2013.

4 Ezzati, M.: Indoor air pollution and health in developing countries, *The Lancet*, 366, 104-106,  
5 10.1016/s0140-6736(05)66845-6, 2008.

6 Galmarini, S., Koffi, B., Solazzo, E., Keating, T., Hogrefe, C., Schulz, M., Benedictow, A.,  
7 Griesfeller, J. J., Janssens-Maenhout, G., and Carmichael, G.: Technical note: Coordination and  
8 harmonization of the multi-scale, multi-model activities HTAP2, AQMEII3, and MICS-Asia3:  
9 simulations, emission inventories, boundary conditions, and model output formats, *Atmos.*  
10 *Chem. Phys.*, 17, 1543-1555, 2017a.

11 Galmarini, S., Koffi, B., Solazzo, E., Keating, T., Hogrefe, C., Schulz, M., Benedictow, A.,  
12 Griesfeller, J. J., Janssens-Maenhout, G., Carmichael, G., Fu, J., and Dentener, F.: Technical  
13 note: Coordination and harmonization of the multi-scale, multi-model activities HTAP2,  
14 AQMEII3, and MICS-Asia3: simulations, emission inventories, boundary conditions, and  
15 model output formats, *Atmos. Chem. Phys.*, 17, 1543-1555, 10.5194/acp-17-1543-2017, 2017b.

16 Hallquist, M., Wenger, J. C., Baltensperger, U., Rudich, Y., Simpson, D., Claeys, M., Dommen,  
17 J., Donahue, N. M., George, C., Goldstein, A. H., Hamilton, J. F., Herrmann, H., Hoffmann, T.,  
18 Iinuma, Y., Jang, M., Jenkin, M. E., Jimenez, J. L., Kiendler-Scharr, A., Maenhout, W.,  
19 McFiggans, G., Mentel, T. F., Monod, A., Prevot, A. S. H., Seinfeld, J. H., Surratt, J. D.,  
20 Szmigielski, R., and Wildt, J.: The formation, properties and impact of secondary organic  
21 aerosol: current and emerging issues, *Atmospheric Chemistry and Physics*, 9, 5155-5236, 2009.

22 IEA: Energy Statistics of OECD and Non-OECD Countries, on-line data service,  
23 <http://data.iea.org>, 2013,2014,2015,2016.

24 Janssens-Maenhout, G., Crippa, M., Guizzardi, D., Dentener, F., Muntean, M., Pouliot, G.,  
25 Keating, T., Zhang, Q., Kurokawa, J., and Wankmüller, R.: HTAP\_v2. 2: a mosaic of regional  
26 and global emission grid maps for 2008 and 2010 to study hemispheric transport of air pollution,  
27 *Atmospheric Chemistry and Physics*, 15, 11411-11432, 2015.

28 Klimont, Z., Kupiainen, K., Heyes, C., Purohit, P., Cofala, J., Rafaj, P., Borken-Kleefeld, J., and  
29 Schöpp, W.: Global anthropogenic emissions of particulate matter including black carbon,  
30 *Atmos. Chem. Phys.*, 17, 8681-8723, 10.5194/acp-17-8681-2017, 2017.

31 Lamarque, J. F., Bond, T. C., Eyring, V., Granier, C., Heil, A., Klimont, Z., Lee, D., Lioussé, C.,  
32 Mieville, A., Owen, B., Schultz, M. G., Shindell, D., Smith, S. J., Stehfest, E., Van Aardenne, J.,  
33 Cooper, O. R., Kainuma, M., Mahowald, N., McConnell, J. R., Naik, V., Riahi, K., and van  
34 Vuuren, D. P.: Historical (1850–2000) gridded anthropogenic and biomass burning emissions of  
35 reactive gases and aerosols: methodology and application, *Atmos. Chem. Phys.*, 10, 7017-7039,  
36 10.5194/acp-10-7017-2010, 2010.

37 Lelieveld, J., Evans, J. S., Fnais, M., Giannadaki, D., and Pozzer, A.: The contribution of outdoor  
38 air pollution sources to premature mortality on a global scale, *Nature*, 525, 367-371,  
39 10.1038/nature15371, 2015.

1 Lim, S. S., Vos, T., Flaxman, A. D., Danaei, G., Shibuya, K., Adair-Rohani, H., AlMazroa, M.  
2 A., Amann, M., Anderson, H. R., Andrews, K. G., Aryee, M., Atkinson, C., Bacchus, L. J.,  
3 Bahalim, A. N., Balakrishnan, K., Balmes, J., Barker-Collo, S., Baxter, A., Bell, M. L., Blore, J.  
4 D., Blyth, F., Bonner, C., Borges, G., Bourne, R., Boussinesq, M., Brauer, M., Brooks, P., Bruce,  
5 N. G., Brunekreef, B., Bryan-Hancock, C., Bucello, C., Buchbinder, R., Bull, F., Burnett, R. T.,  
6 Byers, T. E., Calabria, B., Carapetis, J., Carnahan, E., Chafe, Z., Charlson, F., Chen, H., Chen, J.  
7 S., Cheng, A. T.-A., Child, J. C., Cohen, A., Colson, K. E., Cowie, B. C., Darby, S., Darling, S.,  
8 Davis, A., Degenhardt, L., Dentener, F., Des Jarlais, D. C., Devries, K., Dherani, M., Ding, E. L.,  
9 Dorsey, E. R., Driscoll, T., Edmond, K., Ali, S. E., Engell, R. E., Erwin, P. J., Fahimi, S., Falder,  
10 G., Farzadfar, F., Ferrari, A., Finucane, M. M., Flaxman, S., Fowkes, F. G. R., Freedman, G.,  
11 Freeman, M. K., Gakidou, E., Ghosh, S., Giovannucci, E., Gmel, G., Graham, K., Grainger, R.,  
12 Grant, B., Gunnell, D., Gutierrez, H. R., Hall, W., Hoek, H. W., Hogan, A., Hosgood, H. D., III,  
13 Hoy, D., Hu, H., Hubbell, B. J., Hutchings, S. J., Ibeanusi, S. E., Jacklyn, G. L., Jasrasaria, R.,  
14 Jonas, J. B., Kan, H., Kanis, J. A., Kassebaum, N., Kawakami, N., Khang, Y.-H., Khatibzadeh,  
15 S., Khoo, J.-P., Kok, C., Laden, F., Lalloo, R., Lan, Q., Lathlean, T., Leasher, J. L., Leigh, J., Li,  
16 Y., Lin, J. K., Lipshultz, S. E., London, S., Lozano, R., Lu, Y., Mak, J., Malekzadeh, R.,  
17 Mallinger, L., Marcenes, W., March, L., Marks, R., Martin, R., McGale, P., McGrath, J., Mehta,  
18 S., Memish, Z. A., Mensah, G. A., Merriman, T. R., Micha, R., Michaud, C., Mishra, V.,  
19 Hanafiah, K. M., Mokdad, A. A., Morawska, L., Mozaffarian, D., Murphy, T., Naghavi, M.,  
20 Neal, B., Nelson, P. K., Nolla, J. M., Norman, R., Olives, C., Omer, S. B., Orchard, J., Osborne,  
21 R., Ostro, B., Page, A., Pandey, K. D., Parry, C. D. H., Passmore, E., Patra, J., Pearce, N.,  
22 Pelizzari, P. M., Petzold, M., Phillips, M. R., Pope, D., Pope, C. A., III, Powles, J., Rao, M.,  
23 Razavi, H., Rehfuess, E. A., Rehm, J. T., Ritz, B., Rivara, F. P., Roberts, T., Robinson, C.,  
24 Rodriguez-Portales, J. A., Romieu, I., Room, R., Rosenfeld, L. C., Roy, A., Rushton, L.,  
25 Salomon, J. A., Sampson, U., Sanchez-Riera, L., Sanman, E., Sapkota, A., Seedat, S., Shi, P.,  
26 Shield, K., Shivakoti, R., Singh, G. M., Sleet, D. A., Smith, E., Smith, K. R., Stapelberg, N. J.  
27 C., Steenland, K., Stöckl, H., Stovner, L. J., Straif, K., Straney, L., Thurston, G. D., Tran, J. H.,  
28 Van Dingenen, R., van Donkelaar, A., Veerman, J. L., Vijayakumar, L., Weintraub, R.,  
29 Weissman, M. M., White, R. A., Whiteford, H., Wiersma, S. T., Wilkinson, J. D., Williams, H.  
30 C., Williams, W., Wilson, N., Woolf, A. D., Yip, P., Zielinski, J. M., Lopez, A. D., Murray, C. J.  
31 L., and Ezzati, M.: A comparative risk assessment of burden of disease and injury attributable to  
32 67 risk factors and risk factor clusters in 21 regions, 1990&#x2013;2010: a systematic analysis  
33 for the Global Burden of Disease Study 2010, *The Lancet*, 380, 2224-2260, 10.1016/s0140-  
34 6736(12)61766-8, 2013.

35 Maas, R., and Grennfelt, P.: Towards Cleaner Air. Scientific Assessment Report 2016, EMEP  
36 Steering Body and Working Group on Effects of the Convention on Long-Range Transboundary  
37 Air Pollution, Oslo., 2016.

38 Oh, H.-R., Ho, C.-H., Kim, J., Chen, D., Lee, S., Choi, Y.-S., Chang, L.-S., and Song, C.-K.:  
39 Long-range transport of air pollutants originating in China: a possible major cause of multi-day  
40 high-PM 10 episodes during cold season in Seoul, Korea, *Atmospheric Environment*, 109, 23-30,  
41 2015.

42 Olivier, J. G. J., Janssens-Maenhout, G., Muntean, M., and Peters, J. A. H. W.: Trends in global  
43 CO2 emissions: 2016 Report, PBL Publishers, 2315, 2016.

- 1 Park, M., Song, C., Park, R., Lee, J., Kim, J., Lee, S., Woo, J.-H., Carmichael, G., Eck, T. F., and  
2 Holben, B. N.: New approach to monitor transboundary particulate pollution over Northeast  
3 Asia, *Atmospheric Chemistry and Physics*, 14, 659-674, 2014.
- 4 Pope, C. A., and Dockery, D. W.: Health Effects of Fine Particulate Air Pollution: Lines that  
5 Connect, *Journal of the Air & Waste Management Association*, 56, 709-742,  
6 10.1080/10473289.2006.10464485, 2006.
- 7 Pozzer, A., Tsimpidi, A. P., Karydis, V. A., de Meij, A., and Lelieveld, J.: Impact of agricultural  
8 emission reductions on fine particulate matter and public health, *Atmos. Chem. Phys. Discuss.*,  
9 2017, 1-19, 10.5194/acp-2017-390, 2017.
- 10 Silva, R. A., Adelman, Z., Fry, M. M., and West, J. J.: The impact of individual anthropogenic  
11 emissions sectors on the global burden of human mortality due to ambient air pollution,  
12 *Environmental Health Perspectives*, 124, 1776, 2016.
- 13 Smith, S. J., van Aardenne, J., Klimont, Z., Andres, R. J., Volke, A., and Delgado Arias, S.:  
14 Anthropogenic sulfur dioxide emissions: 1850–2005, *Atmos. Chem. Phys.*, 11, 1101-1116,  
15 10.5194/acp-11-1101-2011, 2011.
- 16 Tsimpidi, A. P., Karydis, V. A., and Pandis, S. N.: Response of Inorganic Fine Particulate Matter  
17 to Emission Changes of Sulfur Dioxide and Ammonia: The Eastern United States as a Case  
18 Study, *Journal of the Air & Waste Management Association*, 57, 1489-1498, 10.3155/1047-  
19 3289.57.12.1489, 2007.
- 20 Van Donkelaar, A., Martin, R. V., Brauer, M., Hsu, N. C., Kahn, R. A., Levy, R. C., Lyapustin,  
21 A., Sayer, A. M., and Winker, D. M.: Global estimates of fine particulate matter using a  
22 combined geophysical-statistical method with information from satellites, models, and monitors,  
23 *Environmental Science & Technology*, 50, 3762-3772, 2016.
- 24 Visschedijk, A., Denier van der Gon, H., Droge, R., and Van der Brugh, H.: A European high  
25 resolution and size-differentiated emission inventory for elemental and organic carbon for the  
26 year 2005, TNO, Utrecht, 2009.
- 27 Weimer, S., Alfarra, M., Schreiber, D., Mohr, M., Prévôt, A., and Baltensperger, U.: Organic  
28 aerosol mass spectral signatures from wood-burning emissions: Influence of burning conditions  
29 and wood type, *Journal of Geophysical Research: Atmospheres*, 113, 2008.
- 30 WHO: Review of evidence on health aspects of air pollution – REVIHAAP, Technical report,  
31 The WHO European Centre for Environment and Health, Bonn, WHO Regional Office for  
32 Europe, 2013.
- 33 WHO:  
34 [http://www.who.int/entity/phe/health\\_topics/outdoorair/databases/OAP\\_database.xls?ua=1](http://www.who.int/entity/phe/health_topics/outdoorair/databases/OAP_database.xls?ua=1),  
35 2011.

WHO:  
http://www.who.int/entity/quantifying\_ehimpacts/national/countryprofile/AAP\_PM\_database\_May2014.xls, 2014.

WHO: <http://apps.who.int/gho/data/view.main.SDGPM25116v?lang=en>, 2016.

WHO: Ambient air pollution: a global assessment of exposure and burden of disease, Geneva: World Health Organization, 2016.

Yu, S., Eder, B., Dennis, R., Chu, S. H., and Schwartz, S. E.: New unbiased symmetric metrics for evaluation of air quality models, Atmospheric Science Letters, 7, 26-34, 2006.

Zhang, Y., Wu, S.-Y., Krishnan, S., Wang, K., Queen, A., Aneja, V. P., and Arya, S. P.: Modeling agricultural air quality: Current status, major challenges, and outlook, Atmospheric Environment, 42, 3218-3237, <https://doi.org/10.1016/j.atmosenv.2007.01.063>, 2008.

**Tables and Figures**

**Table 1 - Sector specific contribution [%] to annual anthropogenic PM<sub>2.5</sub> concentrations for aggregated world regions. The largest contributing sectors (above a threshold of 15%) are shaded in blue.**

|                      | POWER | INDUSTRY | TRANSPORT | RESIDENTIAL | AGRICULTURE | SHIP |
|----------------------|-------|----------|-----------|-------------|-------------|------|
| <b>Africa</b>        | 26.7  | 16.1     | 3.6       | 37.9        | 8.2         | 7.4  |
| <b>China+</b>        | 18.3  | 42       | 7.5       | 23.1        | 8.8         | 0.3  |
| <b>India+</b>        | 20.8  | 19.4     | 11.4      | 45.2        | 3           | 0.2  |
| <b>SE Asia</b>       | 17.1  | 35.9     | 9         | 27.2        | 7.4         | 3.4  |
| <b>Europe</b>        | 15.1  | 14.3     | 18.7      | 19.7        | 27.7        | 4.4  |
| <b>Latin America</b> | 25.6  | 33.7     | 6.6       | 18.9        | 12.6        | 2.6  |
| <b>Middle East</b>   | 37.9  | 25.2     | 9.7       | 11.7        | 13.7        | 1.8  |
| <b>Russia</b>        | 23.5  | 30.9     | 8.6       | 13          | 23.1        | 0.8  |
| <b>North America</b> | 20.4  | 23.5     | 10.8      | 15.5        | 25.6        | 4.2  |
| <b>Oceania</b>       | 13.9  | 30.7     | 5.1       | 9.8         | 18.6        | 21.8 |

**Table 2 - Annual average PM<sub>2.5</sub> concentrations (µg/m<sup>3</sup>) with upper and lower range in brackets due to emission inventories uncertainty (1 standard deviation, σ). The upper and lower range of PM<sub>2.5</sub> concentrations are calculated as the reference concentrations multiplied and divided by (1+σ) respectively. The third column reflects the fractional uncertainty due to the contribution of primary PM<sub>2.5</sub> emissions.**

| World region | TM5-FASST region           | PM <sub>2.5</sub> concentration (µg/m <sup>3</sup> ) | Fraction of uncertainty due to primary PM emissions (%) |
|--------------|----------------------------|------------------------------------------------------|---------------------------------------------------------|
| Asia         | South Korea                | 13.8 (8.3 - 24.9)                                    | 71%                                                     |
|              | Japan                      | 6.9 (3.8 - 13.3)                                     | 84%                                                     |
|              | Mongolia+ North Korea      | 14.6 (9.0 - 25.9)                                    | 75%                                                     |
|              | China                      | 39.9 (22.4 - 76.6)                                   | 78%                                                     |
|              | Taiwan                     | 6.4 (3.7 - 10.9)                                     | 77%                                                     |
|              | Rest of South Asia         | 29.3 (13.9 - 64.9)                                   | 87%                                                     |
|              | India                      | 34.7 (16.6 - 73.4)                                   | 86%                                                     |
|              | Indonesia                  | 2.4 (1.3 - 4.6)                                      | 86%                                                     |
|              | Thailand                   | 8.0 (5.1 - 12.6)                                     | 88%                                                     |
|              | Malaysia                   | 3.1 (1.8 - 5.2)                                      | 85%                                                     |
|              | Philippines                | 2.0 (1.1 - 3.8)                                      | 80%                                                     |
|              | Vietnam                    | 14.2 (7.0 - 30.4)                                    | 92%                                                     |
|              | Rest of South Eastern Asia | 8.6 (4.6 - 17.6)                                     | 89%                                                     |
| Europe       | Austria+Slovenia           | 8.4 (4.0 - 19.6)                                     | 59%                                                     |
|              | Switzerland                | 10.1 (4.9 - 23.3)                                    | 52%                                                     |
|              | Benelux                    | 10.1 (5.2 - 22.7)                                    | 59%                                                     |
|              | Spain+Portugal             | 5.4 (3.4 - 9.4)                                      | 77%                                                     |
|              | Finland                    | 2.6 (1.3 - 5.8)                                      | 66%                                                     |
|              | France                     | 9.3 (5.0 - 19.0)                                     | 69%                                                     |
|              | Great Britain+Ireland      | 6.1 (3.2 - 13.0)                                     | 66%                                                     |
|              | Greece+Cyprus              | 7.6 (4.8 - 12.7)                                     | 74%                                                     |
|              | Italy+Malta                | 11.8 (6.2 - 25.2)                                    | 64%                                                     |
|              | Germany                    | 9.3 (5.0 - 20.0)                                     | 54%                                                     |
|              | Sweden+Denmark             | 4.1 (2.2 - 8.4)                                      | 65%                                                     |
|              | Norway                     | 2.4 (1.2 - 5.4)                                      | 89%                                                     |
|              | Bulgaria                   | 10.6 (5.4 - 21.6)                                    | 66%                                                     |
|              | Hungary                    | 9.2 (4.4 - 21.6)                                     | 60%                                                     |
|              | Poland+Baltic              | 7.9 (3.6 - 20.2)                                     | 54%                                                     |
|              | Rest of Central EU         | 9.3 (4.7 - 20.4)                                     | 63%                                                     |
|              | Czech Republic             | 10.3 (4.8 - 25.1)                                    | 58%                                                     |
|              | Romania                    | 10.9 (5.5 - 24.1)                                    | 67%                                                     |

| World region      | TM5-FASST region        | PM <sub>2.5</sub> concentration (µg/m <sup>3</sup> ) | Fraction of uncertainty due to primary PM emissions (%) |
|-------------------|-------------------------|------------------------------------------------------|---------------------------------------------------------|
| Africa            | Northern Africa         | 4.2 (2.3 - 4.3)                                      | 80%                                                     |
|                   | Egypt                   | 11.0 (5.0 - 27.8)                                    | 46%                                                     |
|                   | Western Africa          | 4.0 (1.7 - 10.2)                                     | 96%                                                     |
|                   | Eastern Africa          | 2.7 (1.4 - 5.7)                                      | 89%                                                     |
|                   | Southern Africa         | 1.0 (0.5 - 2.2)                                      | 90%                                                     |
|                   | Rep. of South Africa    | 6.1 (3.1 - 12.5)                                     | 84%                                                     |
| Gulf/ Middle East | Middle East             | 9.2 (5.4 - 17.8)                                     | 58%                                                     |
|                   | Turkey                  | 8.7 (4.9 - 17.1)                                     | 67%                                                     |
|                   | Gulf region             | 7.8 (4.7 - 14.5)                                     | 57%                                                     |
| Latin America     | Brazil                  | 1.6 (1.1 - 2.6)                                      | 85%                                                     |
|                   | Mexico                  | 4.2 (2.1 - 9.2)                                      | 62%                                                     |
|                   | Rest of Central America | 2.0 (1.0 - 4.0)                                      | 78%                                                     |
|                   | Chile                   | 13.7 (7.3 - 29)                                      | 70%                                                     |
|                   | Argentina+Uruguay       | 1.1 (0.7 - 1.9)                                      | 77%                                                     |
|                   | Rest of South America   | 2.4 (1.6 - 3.9)                                      | 69%                                                     |
| NA                | Canada                  | 4.3 (2.4 - 8.3)                                      | 66%                                                     |
|                   | USA                     | 7.8 (4.4 - 14.4)                                     | 71%                                                     |
| Russia            | Kazakhstan              | 4.9 (3.2 - 8.9)                                      | 62%                                                     |
|                   | Former USSR Asia        | 7.5 (4.0 - 17.6)                                     | 49%                                                     |
|                   | Russia (EU)             | 3.3 (1.9 - 6.7)                                      | 57%                                                     |
|                   | Russia (Asia)           | 2.7 (1.7 - 5.1)                                      | 64%                                                     |
|                   | Ukraine                 | 7.8 (4.2 - 15.9)                                     | 65%                                                     |
| Oceania           | Australia               | 1.1 (0.8 - 1.4)                                      | 84%                                                     |
|                   | New Zealand             | 0.3 (0.1 - 0.5)                                      | 60%                                                     |
|                   | Pacific Islands         | 0.2 (0.1 - 0.4)                                      | 75%                                                     |



**Table 3 - PM<sub>2.5</sub> concentrations due to the residential sector emissions in Europe, European part of Russia, Ukraine and Turkey and uncertainty range including the uncertainty in the biomass consumption for the same sector.**

|                              | <b>PM<sub>2.5</sub> (µg/m<sup>3</sup>) - RESIDENTIAL</b> | <b>PM<sub>2.5</sub> (µg/m<sup>3</sup>)- RESIDENTIAL including biomass uncertainty</b> |
|------------------------------|----------------------------------------------------------|---------------------------------------------------------------------------------------|
| <b>Romania</b>               | 3.1                                                      | 11.4                                                                                  |
| <b>Czech Republic</b>        | 2.9                                                      | 10.7                                                                                  |
| <b>Italy+Malta</b>           | 3.6                                                      | 10.6                                                                                  |
| <b>Rest of Central EU</b>    | 2.5                                                      | 9.2                                                                                   |
| <b>Hungary</b>               | 2.5                                                      | 9.1                                                                                   |
| <b>Bulgaria</b>              | 2.3                                                      | 8.6                                                                                   |
| <b>Poland+Baltic</b>         | 2.2                                                      | 8.3                                                                                   |
| <b>Austria+Slovenia</b>      | 2.2                                                      | 7.1                                                                                   |
| <b>Ukraine</b>               | 1.7                                                      | 6.1                                                                                   |
| <b>France</b>                | 2.1                                                      | 6.0                                                                                   |
| <b>Turkey</b>                | 1.7                                                      | 5.9                                                                                   |
| <b>Norway</b>                | 1.3                                                      | 4.1                                                                                   |
| <b>Switzerland</b>           | 1.4                                                      | 3.9                                                                                   |
| <b>Greece+Cyprus</b>         | 1.2                                                      | 3.8                                                                                   |
| <b>Germany</b>               | 1.1                                                      | 3.0                                                                                   |
| <b>Spain+Portugal</b>        | 1.0                                                      | 2.7                                                                                   |
| <b>Benelux</b>               | 0.9                                                      | 2.5                                                                                   |
| <b>Sweden+Denmark</b>        | 0.8                                                      | 2.4                                                                                   |
| <b>Finland</b>               | 0.7                                                      | 2.1                                                                                   |
| <b>Great Britain+Ireland</b> | 0.7                                                      | 1.8                                                                                   |
| <b>Russia (EU)</b>           | 0.4                                                      | 1.3                                                                                   |

**Table 4 – Absolute and population size normalized number of premature deaths/year due to anthropogenic PM<sub>2.5</sub> air pollution in world regions and corresponding uncertainty range.**

|               | <b>PD (thousand deaths/year)</b> | <b>Normalized PD (deaths/year/million people)</b> |
|---------------|----------------------------------|---------------------------------------------------|
| China+        | 670 (350 - 100)                  | 669                                               |
| India+        | 610 (270 - 960)                  | 609                                               |
| Europe        | 260 (140 - 480)                  | 405                                               |
| SE Asia       | 150 (83 - 250)                   | 50                                                |
| Russia        | 110 (67 - 240)                   | 449                                               |
| North America | 100 (55 - 170)                   | 306                                               |
| Africa        | 74 (34 - 160)                    | 90                                                |
| Middle East   | 56 (32 - 97)                     | 237                                               |
| Latin America | 26 (14 - 53)                     | 49                                                |
| Oceania       | 0.055 (0.034 - 0.12)             | 2                                                 |

**Table 5 – Number of premature deaths for each receptor region including the within-region and extra-regional attribution. For the RERER metric refer also to Table S2.**

| <b>world regions</b> | <b>TM5-FASST region code</b>      | <b>PDs in receptor region<br/>(deaths/year)</b> | <b>Within-region<br/>PDs (deaths/year)</b> | <b>Extra-regional PDs<br/>(deaths/year)</b> |
|----------------------|-----------------------------------|-------------------------------------------------|--------------------------------------------|---------------------------------------------|
| <b>Africa</b>        | <b>Eastern Africa</b>             | 16705                                           | 8218                                       | 8487                                        |
| <b>Africa</b>        | <b>Egypt</b>                      | 17282                                           | 11380                                      | 5902                                        |
| <b>Africa</b>        | <b>Northern Africa</b>            | 5424                                            | 3427                                       | 1997                                        |
| <b>Africa</b>        | <b>Rep. of South Africa</b>       | 9065                                            | 8797                                       | 268                                         |
| <b>Africa</b>        | <b>Southern Africa</b>            | 345                                             | 322                                        | 23                                          |
| <b>Africa</b>        | <b>Western Africa</b>             | 25081                                           | 19785                                      | 5296                                        |
| <b>Asia</b>          | <b>China</b>                      | 655870                                          | 643129                                     | 12741                                       |
| <b>Asia</b>          | <b>Indonesia</b>                  | 17780                                           | 14803                                      | 2977                                        |
| <b>Asia</b>          | <b>India</b>                      | 474660                                          | 412298                                     | 62362                                       |
| <b>Asia</b>          | <b>Japan</b>                      | 25636                                           | 15181                                      | 10455                                       |
| <b>Asia</b>          | <b>South Korea</b>                | 25295                                           | 7510                                       | 17784                                       |
| <b>Asia</b>          | <b>Mongolia+North Korea</b>       | 12657                                           | 4076                                       | 8581                                        |
| <b>Asia</b>          | <b>Malaysia</b>                   | 2014                                            | 1058                                       | 957                                         |
| <b>Asia</b>          | <b>Philippines</b>                | 121                                             | 94                                         | 27                                          |
| <b>Asia</b>          | <b>Rest of South Asia</b>         | 134280                                          | 67170                                      | 67110                                       |
| <b>Asia</b>          | <b>Rest of South Eastern Asia</b> | 23316                                           | 3814                                       | 19502                                       |
| <b>Asia</b>          | <b>Thailand</b>                   | 21231                                           | 10495                                      | 10736                                       |
| <b>Asia</b>          | <b>Taiwan</b>                     | 3443                                            | 1028                                       | 2415                                        |
| <b>Asia</b>          | <b>Vietnam</b>                    | 30750                                           | 20286                                      | 10464                                       |
| <b>Europe</b>        | <b>Austria+Slovenia</b>           | 6073                                            | 1806                                       | 4267                                        |
| <b>Europe</b>        | <b>Bulgaria</b>                   | 4739                                            | 1709                                       | 3030                                        |
| <b>Europe</b>        | <b>Benelux</b>                    | 9090                                            | 4201                                       | 4889                                        |
| <b>Europe</b>        | <b>Switzerland</b>                | 3200                                            | 1568                                       | 1632                                        |
| <b>Europe</b>        | <b>Czech Republic</b>             | 7936                                            | 2696                                       | 5240                                        |
| <b>Europe</b>        | <b>Germany</b>                    | 36256                                           | 18595                                      | 17661                                       |
| <b>Europe</b>        | <b>Spain+Portugal</b>             | 11291                                           | 8487                                       | 2804                                        |
| <b>Europe</b>        | <b>Finland</b>                    | 0                                               | 0                                          | 0                                           |
| <b>Europe</b>        | <b>France</b>                     | 22046                                           | 13320                                      | 8727                                        |
| <b>Europe</b>        | <b>Great Britain+Ireland</b>      | 13949                                           | 9459                                       | 4490                                        |
| <b>Europe</b>        | <b>Greece+Cyprus</b>              | 3117                                            | 1133                                       | 1984                                        |
| <b>Europe</b>        | <b>Hungary</b>                    | 14211                                           | 3820                                       | 10391                                       |
| <b>Europe</b>        | <b>Italy+Malta</b>                | 24417                                           | 16312                                      | 8105                                        |
| <b>Europe</b>        | <b>Norway</b>                     | 674                                             | 516                                        | 158                                         |
| <b>Europe</b>        | <b>Poland+Baltic</b>              | 28686                                           | 15877                                      | 12809                                       |
| <b>Europe</b>        | <b>Rest of Central EU</b>         | 6764                                            | 3418                                       | 3346                                        |

|               |                         |       |       |       |
|---------------|-------------------------|-------|-------|-------|
| Europe        | Romania                 | 14155 | 6979  | 7176  |
| Europe        | Sweden+Denmark          | 2650  | 1021  | 1629  |
| Latin America | Argentina+Uruguay       | 133   | 75    | 58    |
| Latin America | Brazil                  | 4261  | 3968  | 293   |
| Latin America | Chile                   | 3332  | 3283  | 49    |
| Latin America | Mexico                  | 10478 | 8447  | 2031  |
| Latin America | Rest of Central America | 3413  | 2772  | 640   |
| Latin America | Rest of South America   | 4489  | 4164  | 325   |
| Middle East   | Gulf region             | 15176 | 11225 | 3951  |
| Middle East   | Middle East             | 6784  | 2804  | 3980  |
| Middle East   | Turkey                  | 34151 | 24191 | 9960  |
| North America | Canada                  | 3262  | 1491  | 1771  |
| North America | USA                     | 97877 | 90176 | 7701  |
| Oceania       | Australia               | 28    | 25    | 3     |
| Oceania       | New Zealand             | 24    | 15    | 9     |
| Oceania       | Pacific Islands         | 3     | 1     | 2     |
| Russia        | Kazakhstan              | 3389  | 1100  | 2290  |
| Russia        | Former USSR Asia        | 10757 | 6420  | 4337  |
| Russia        | Russia (Asia)           | 1348  | 601   | 746   |
| Russia        | Russia (EU)             | 25149 | 12704 | 12445 |
| Russia        | Ukraine                 | 71724 | 44604 | 27120 |

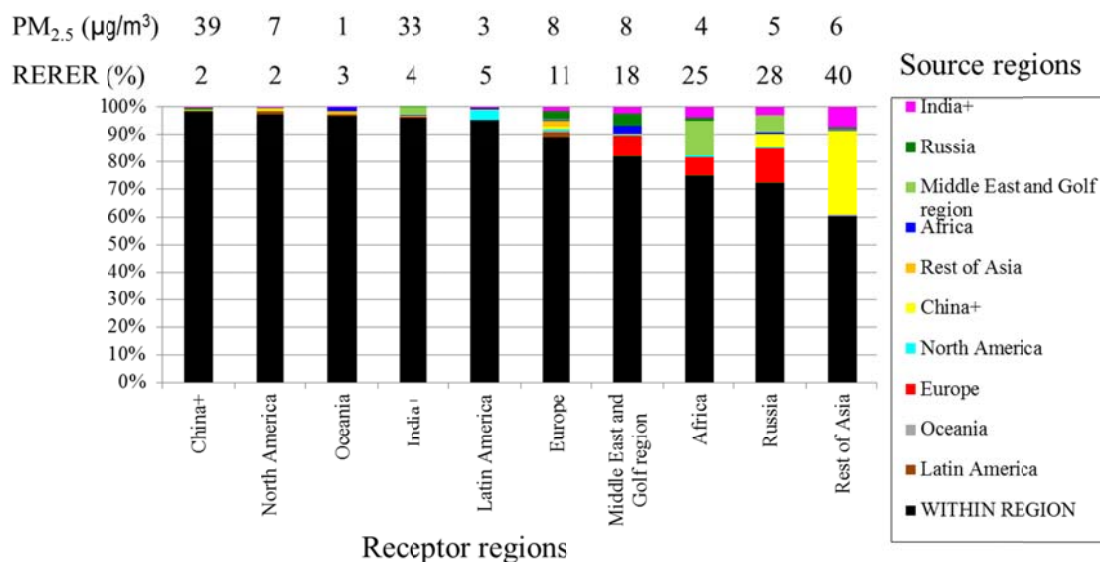

Figure 1 – Within-region vs. imported extra-regional anthropogenic population weighted PM<sub>2.5</sub> concentrations [%] for aggregated world regions. Annual average population weighted anthropogenic concentrations (in µg/m<sup>3</sup>) are reported on top of each bar together with the RERER metric (%). Ship emissions were not included.

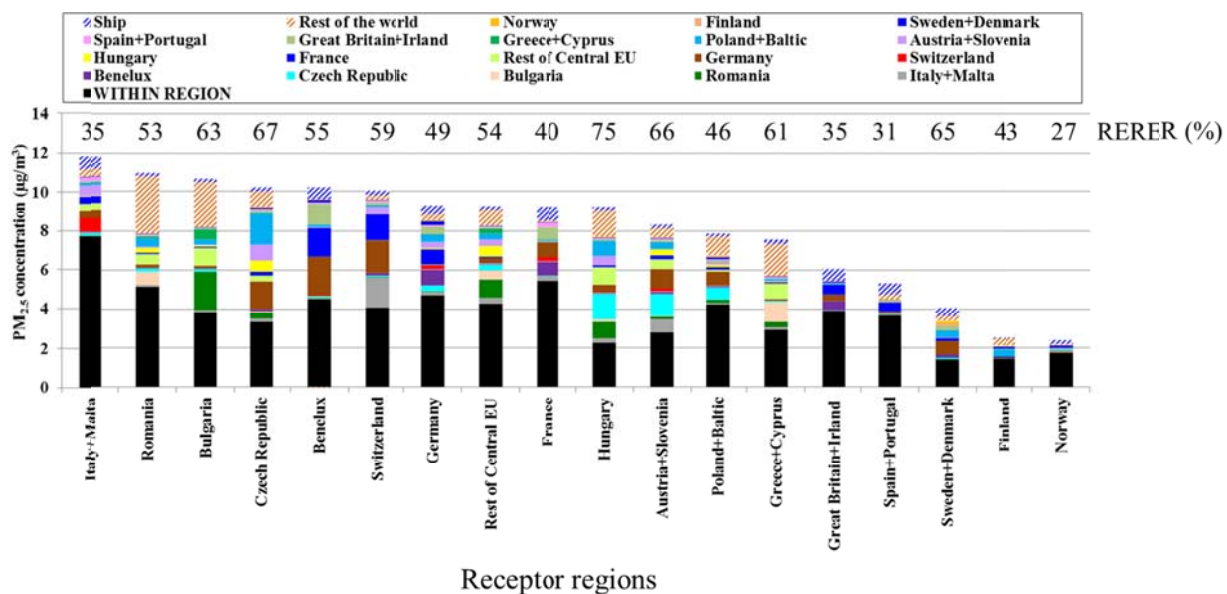

Figure 2 – Anthropogenic PM<sub>2.5</sub> concentrations in 18 countries and sub-regions in Europe separated in within-region and extra-regional contributions. The RERER metric (%) is reported on top of each bar.

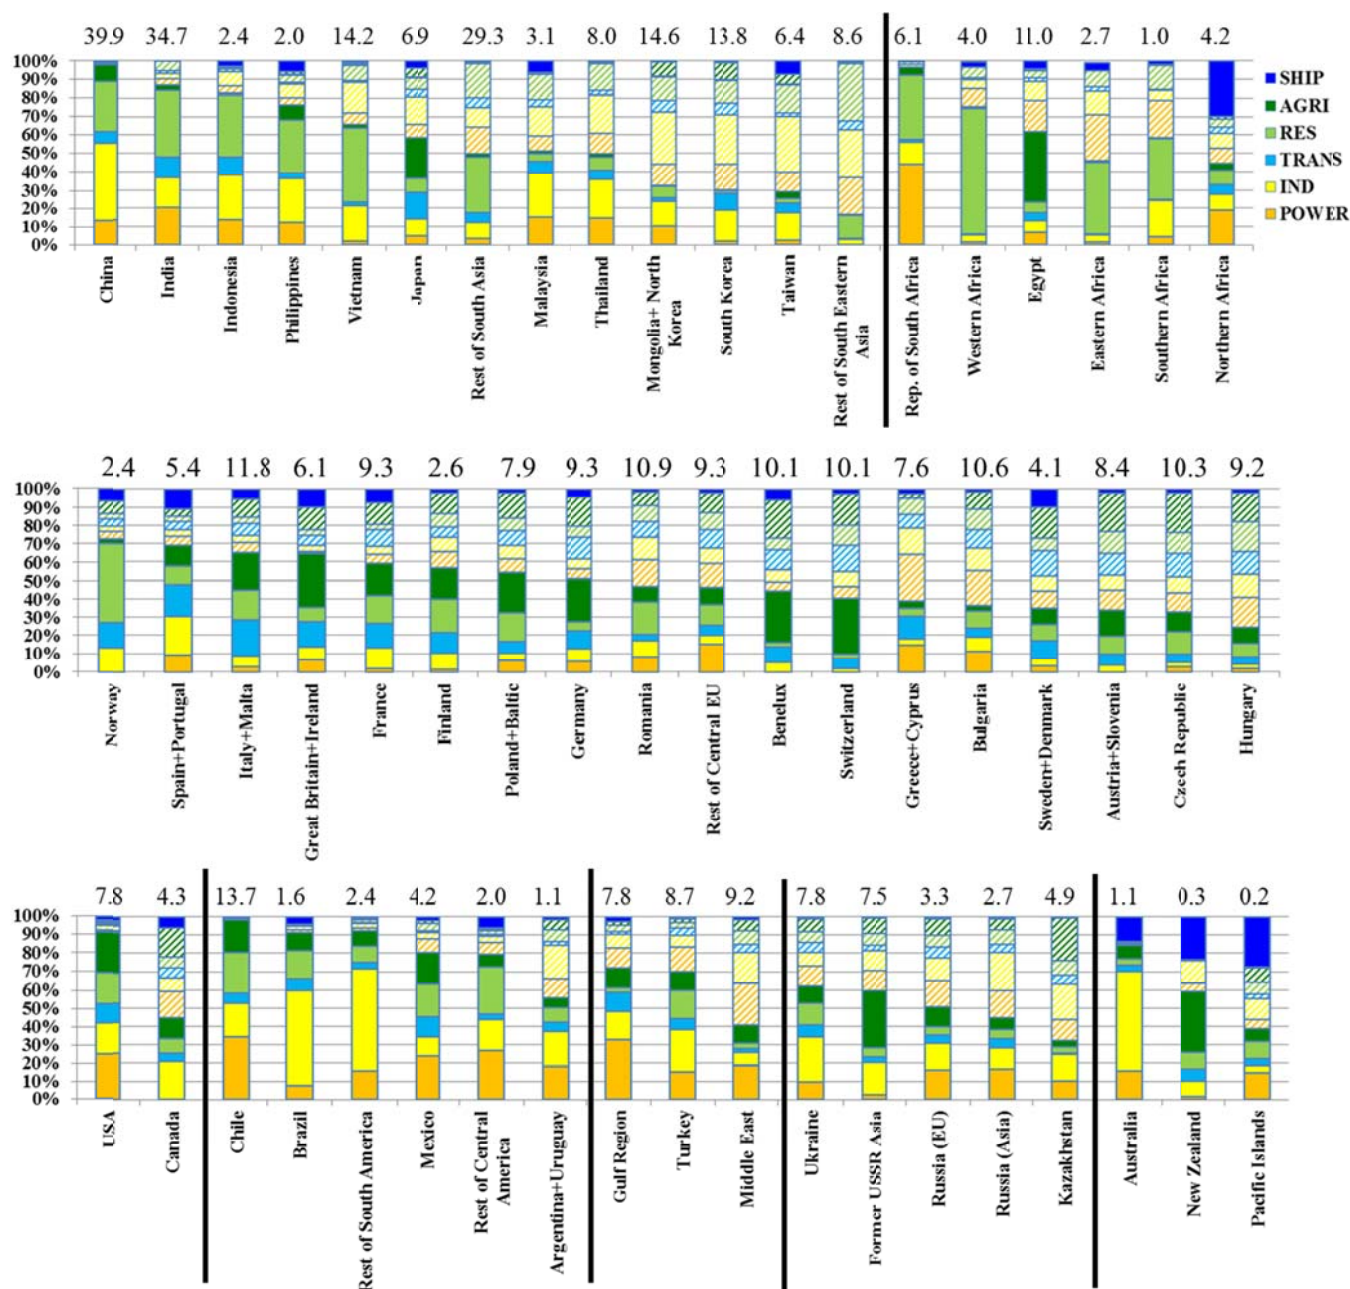

Figure 3 - Fraction of within-region and extra-regional (shaded areas) anthropogenic PM<sub>2.5</sub> concentrations separate by sector for receptor region within the macro-regions: Asia and Africa (upper panel), Europe (middle panel), North America, Latin America, Middle East, Russia and Oceania (lower panel). Annual averaged anthropogenic concentrations (in µg/m<sup>3</sup>) are reported on top of each bar. The RERER metric (%) for the 56 TM5-FASST regions is also reported in Table S2.



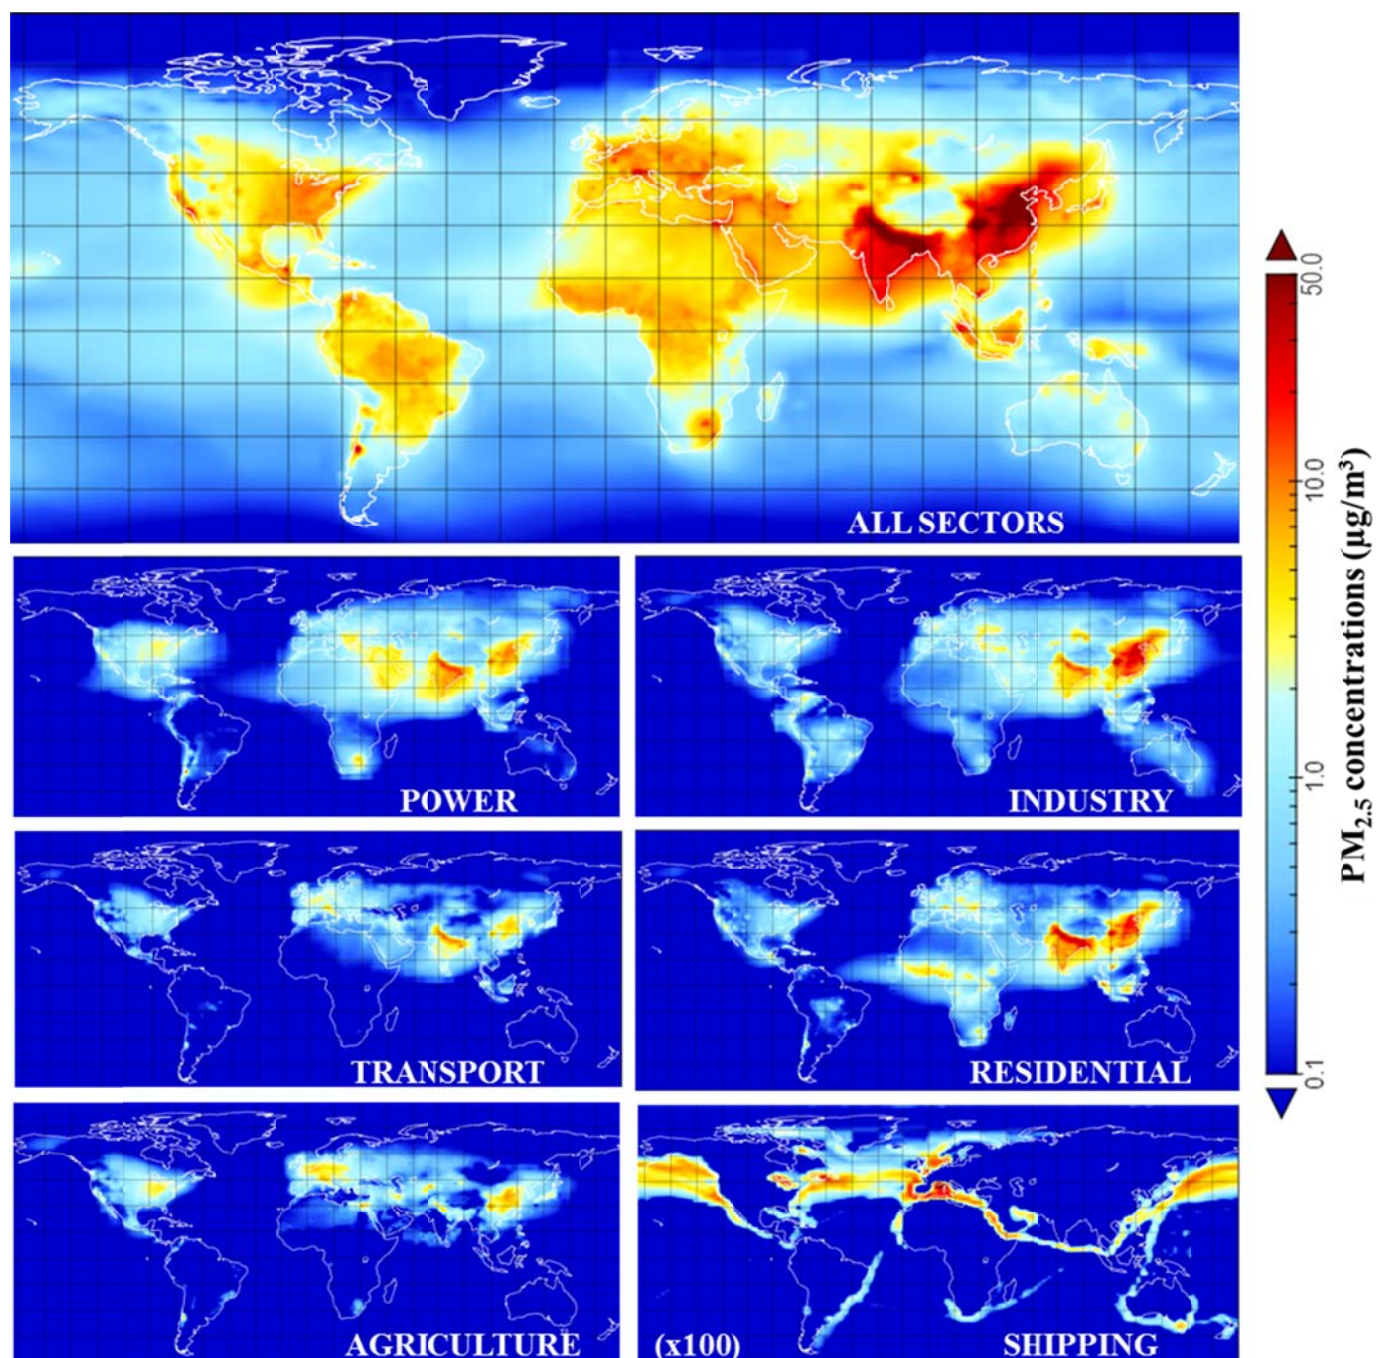

Figure 4 – Total anthropogenic PM<sub>2.5</sub> concentrations (µg/m³) and sectorial contributions using 2010 emissions.

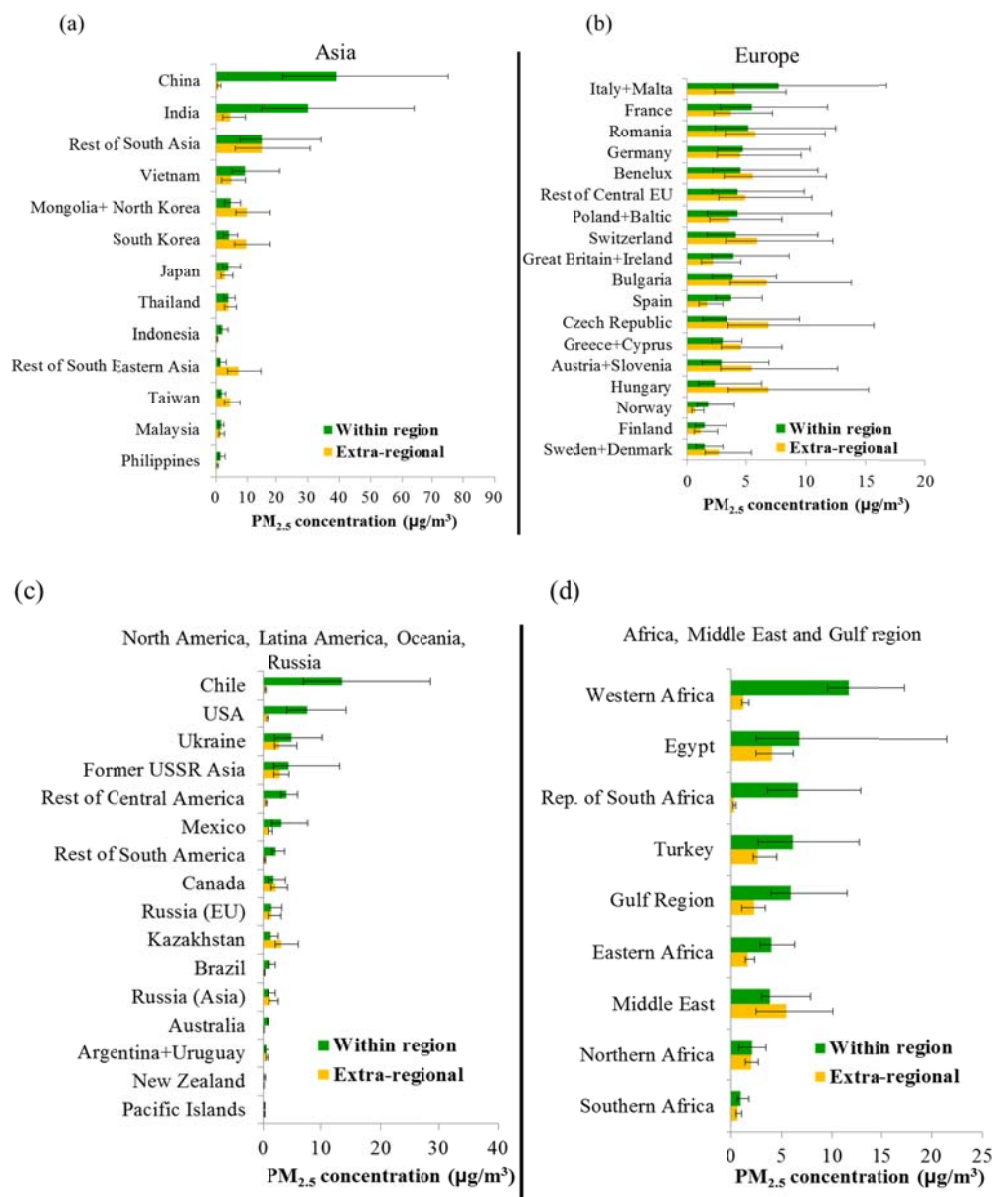

**Figure 5 - Within-region and extra-regional anthropogenic PM<sub>2.5</sub> concentrations for Asia (panel *a*), Europe (panel *b*), North America, Latin America, Oceania and Russia (panel *c*) and Africa, Gulf region and Middle East (panel *d*). The error bars are calculated multiplying and dividing the reference emissions by (1+σ) as discussed in Sect. 2.3.**

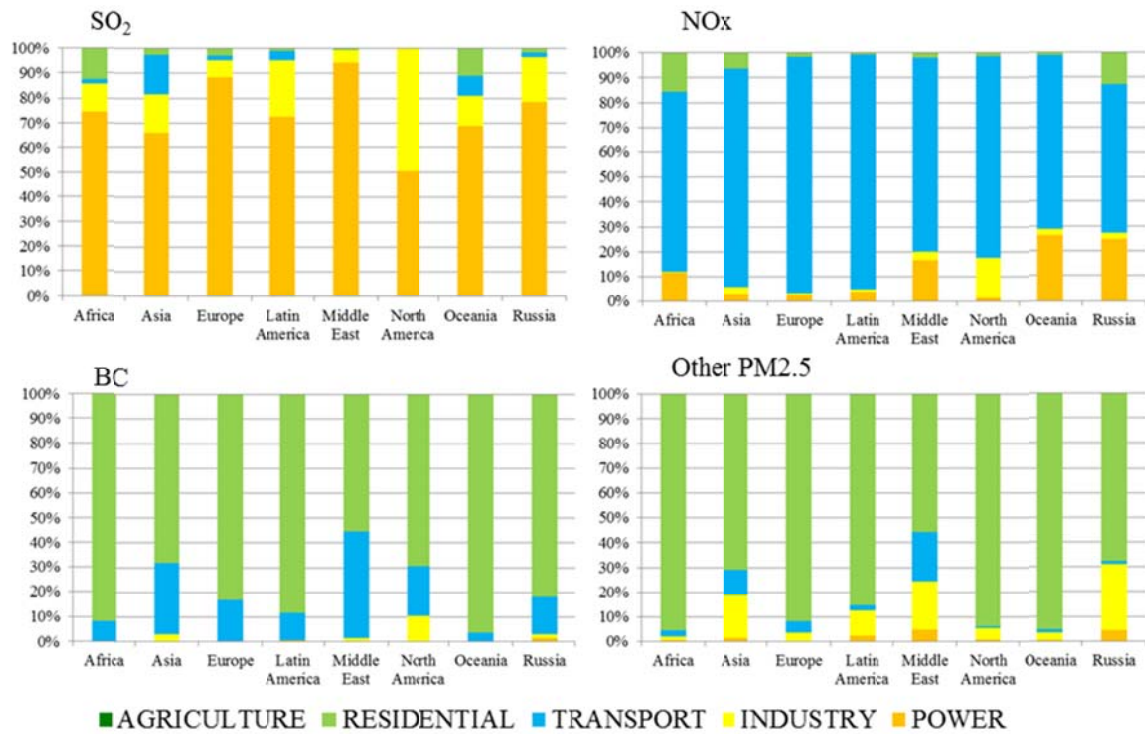

Figure 6 – Contribution of anthropogenic sectors to the emission uncertainty of various pollutants for different world regions.

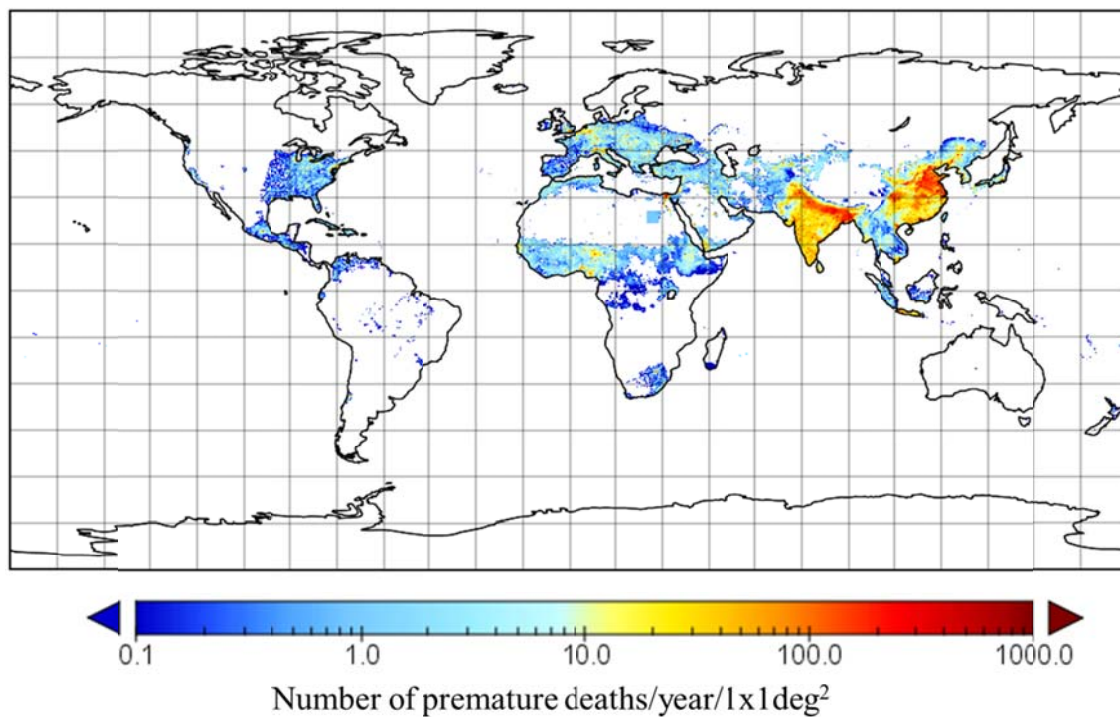



**Figure 7 – Global distribution of premature deaths in 2010 caused by anthropogenic particulate matter pollution estimated using the methodology described in Burnett et al. (2014).**

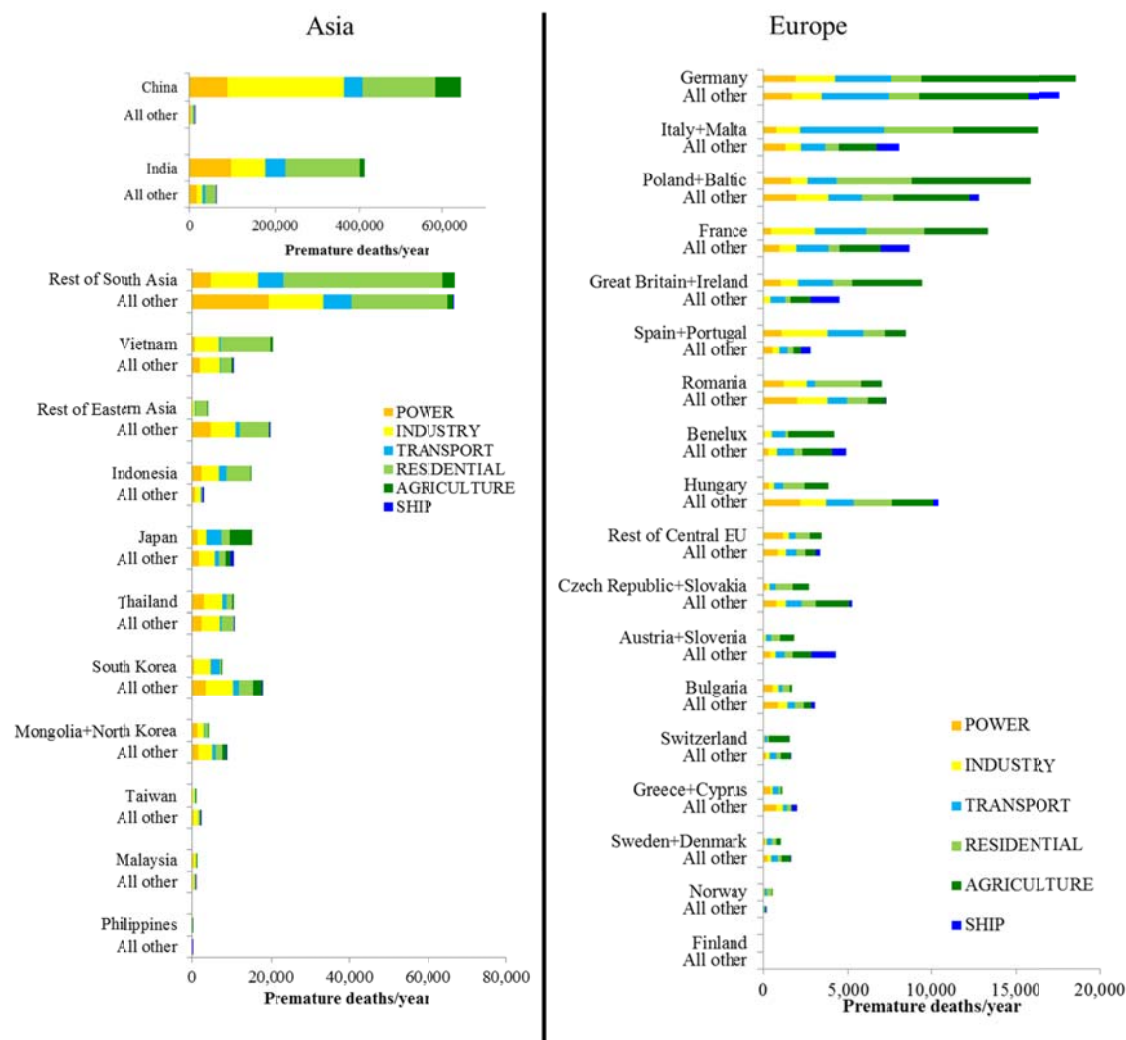

**Figure 8a – Anthropogenic emission sector contributions to premature mortality (deaths/year) due to PM<sub>2.5</sub> population weighted concentrations in the TM5-FASST receptor regions of Asia (left) and Europe (right).**

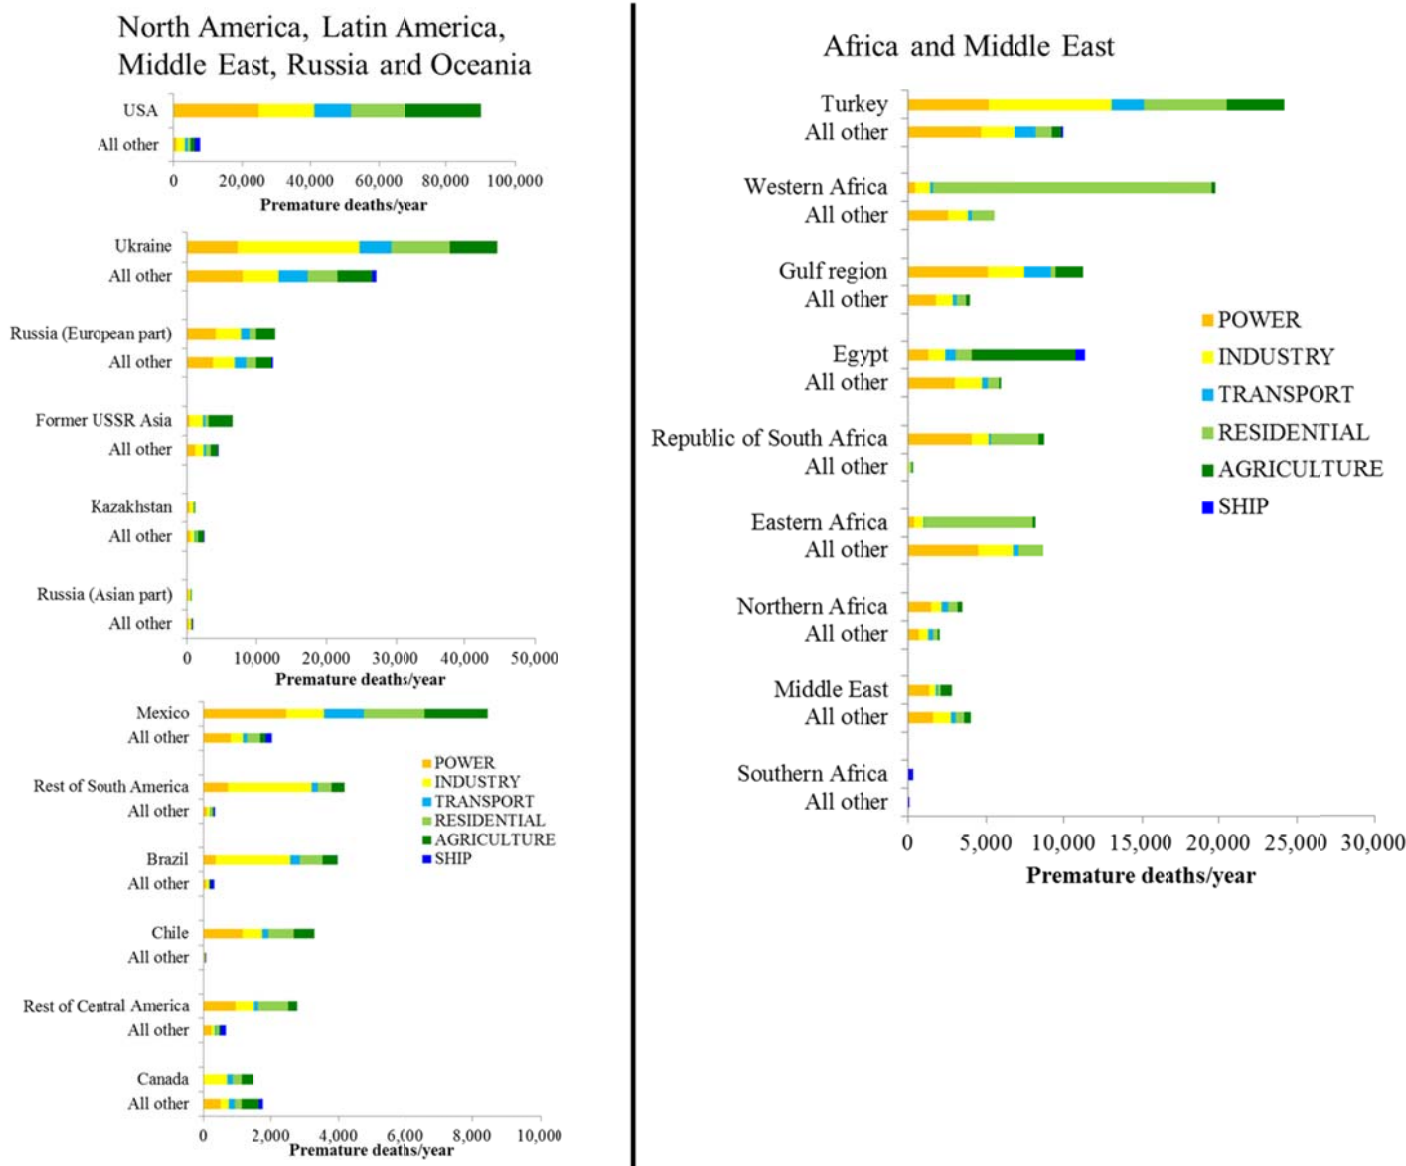

**Figure 8b – Anthropogenic emission sector contributions to premature mortality (deaths/year) due to PM<sub>2.5</sub> population weighted concentrations in the TM5-FASST receptor regions of North America, Latin America, Russia, Middle East and Oceania (left hand side) and Africa (right hand side). Note that mortality estimates for Argentina+Uruguay, Australia, New Zealand and Pacific Islands are not reported being several orders of magnitude lower than other countries estimates.**
